# Supplementary material for: The structure and bonding of Y, Eu, U, Am and Cm complexes as studied by quantum chemical methods and X-ray crystallography
Source: Royal Society of Chemistry journal article supplement (doi:10.1039/b926508b), 2010-01-01
Supplement: b926508b.pdf [file b926508b.pdf]

# Supporting Information for: Structure and Dynamics of Binary and Ternary Lanthanide(III) and Actinide(III) - Tris[4,4,4-trifluoro-1-(2-thienyl)-1,3-butanedione] (TTA) – Tributylphosphate (TBP) Complexes. Part 1, The Structure and Bonding of Y, Eu, U, Am and Cm Complexes as Studied by Quantum Chemical Methods and X-Ray crystallography

Valerie Vallet,<sup>a</sup> Andreas Fischer,<sup>b</sup> Zoltán Szabó<sup>b</sup> and Ingmar Grenthe<sup>\*b</sup>

<sup>a</sup> Université Lille1 (Sciences et Technologies), Laboratoire PhLAM, CNRS UMR 8523, Bât P5, F-59655, Villeneuve d'Ascq.

<sup>b</sup> KTH, Royal Institute of Technology, Inorganic Chemistry S-100 44 Stockholm, Sweden. Fax: 46 8 212626; Tel: 46 8 790 8144; E-mail: ingmarg@kth.se

## Contents

|          |                                                                                                                                                                                                                                                                                                      |      |
|----------|------------------------------------------------------------------------------------------------------------------------------------------------------------------------------------------------------------------------------------------------------------------------------------------------------|------|
| Fig. S1  | The X-ray structures of Isomer I of $\text{Eu}(\text{TTA})_3(\text{OH}_2)_2$ and $\text{Eu}(\text{TTA})_3(\text{OH}_2)_2$ showing the disorder of the thienyl group in one of the coordinated TTA ligands. The third structure, Isomer II, is the monoclinic Eu-structure from White <sup>25</sup> . | S-3  |
| Fig. S2  | Comparison of the X-ray structure, Isomer I, of $\text{Y}(\text{TTA})_3(\text{OH}_2)_2$ with corresponding QM/SPP structures in gas-phase and those obtained in CPCM models of $\text{CHCl}_3$ and water.                                                                                            | S-4  |
| Fig. S3  | Comparison of the X-ray structure, Isomer II, of $\text{Eu}(\text{TTA})_3(\text{OH}_2)_2$ with corresponding QM/LPP structures in gas-phase / $\text{CCl}_4$ and those obtained in CPCM models of $\text{CHCl}_3$ and water.                                                                         | S-5  |
| Fig. S4  | Perspective views of QM/SPP structures of Isomer I in $\text{CHCl}_3$ for Eu, U, Am and Cm.                                                                                                                                                                                                          | S-6  |
| Fig. S5  | Perspective views of QM/SPP structures of Isomer II in $\text{CHCl}_3$ for Eu, U, Am and Cm.                                                                                                                                                                                                         | S-7  |
| Fig. S6  | U(III) structures calculated using LPP (a – c), and using SPP (d).                                                                                                                                                                                                                                   | S-8  |
| Fig. S7  | Y(III) structures of two isomers with different TTA configuration than in Isomer I                                                                                                                                                                                                                   | S-9  |
| Table S1 | Interatomic distances in the triclinic (Isomer I) Y and Eu structures from X-Ray and QM calculations with the def2-TZVP basis sets; the net charge of the metal from n(p), n(d), n(f) populations of the valence orbitals and the spin density of the metal.                                         | S-10 |
| Table S2 | The same information for Isomer II.                                                                                                                                                                                                                                                                  | S-11 |
| Table S3 | Average M - $\text{O}_{\text{TTA}}$ distances in Å in the X-ray structures and corresponding QM values obtained using the LPP and SPP potentials in the QM calculations, with the def-TZVP basis sets. $\Delta$ denotes the difference in the average distance in the various structures             | S-12 |

|          |                                                                                                                                                                                                                                                                                                                                |      |
|----------|--------------------------------------------------------------------------------------------------------------------------------------------------------------------------------------------------------------------------------------------------------------------------------------------------------------------------------|------|
|          | obtained using the two core potentials.                                                                                                                                                                                                                                                                                        |      |
| Table S4 | Relative electronic and Gibbs energies in kJ/mol between isomers I and II, $E(\text{IsomII}) - E(\text{IsomI})$ , computed at the MP2 level from structures optimized with the LPP and SPP pseudopotentials, in the gas-phase, or solvent models of carbon tetrachloride, chloroform and water, using the def-TZVP basis sets. | S-13 |
| Table S5 | Relative energies of various $\text{Y}(\text{TTA})_3(\text{OH}_2)_2$ isomers computed with the def2-TZVP basis sets.                                                                                                                                                                                                           | S-14 |
| Table S6 | Coordinates and electronic energies of the QM structures discussed                                                                                                                                                                                                                                                             | S-15 |

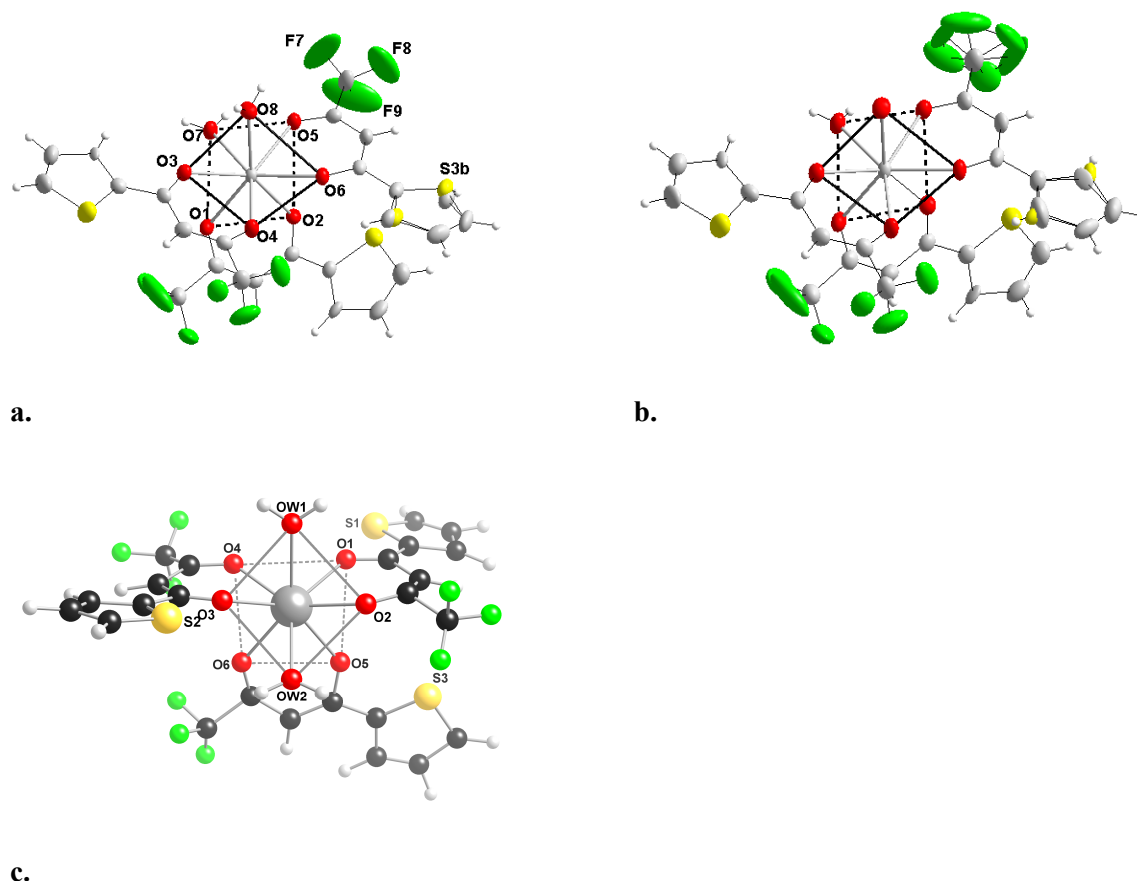

**Figure S1.** (a) The triclinic (Isomer I) X-ray structure of  $\text{Eu}(\text{TTA})_3(\text{OH}_2)_2$ . The disorder in the thienyl ring seems to be related to two possible orientations related by a  $180^\circ$  rotation, where the occupation of the site S3b is 0.7. The large thermal anisotropy in the  $-\text{CF}_3$  group (F7, F8, F9) is possibly related to this rotational disorder. The disorder might be related to the absence of strong packing interactions between the complexes. (b) The triclinic structure of  $\text{Y}(\text{TTA})_3(\text{OH}_2)_2$  displays the same type of disorder as in the Eu complex. However, here there is a complete rotational disorder in the  $-\text{CF}_3$  group in the TTA ligand containing the disordered thienyl group. In both structures (a) and (b) we noted that the C – C distances in the disordered thienyl group deviated significantly from those in the other two thienyl groups. This is presumable due to the overlap of S and a C atom. (c) The monoclinic structure of  $\text{Eu}(\text{TTA})_3(\text{OH}_2)_2$  plotted using the coordinates from the X-ray structure of White.<sup>25</sup>

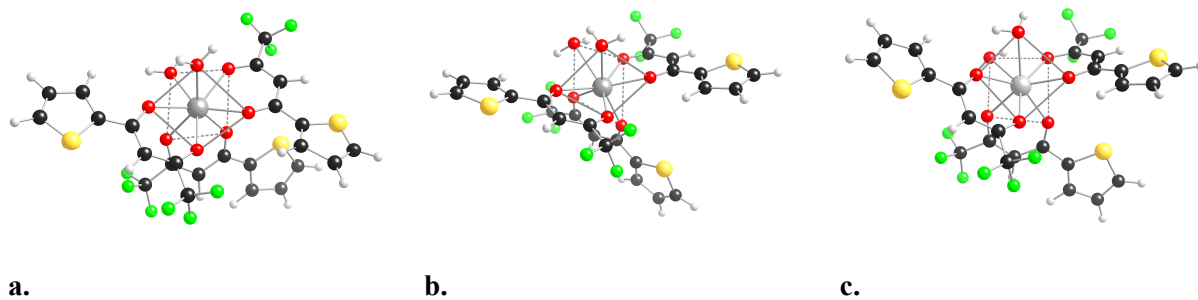

**Figures S2.** Comparison of the X-ray structure of Isomer I, of  $Y(TTA)_3(OH)_2$  with: (a) the corresponding QM/SPP structures in gas-phase and  $CCl_4$  (b) the structure in the CPCM model of  $CHCl_3$  and (c) water. The latter almost superposes the X-Ray structure, with the exception of the disordered thienyl group.



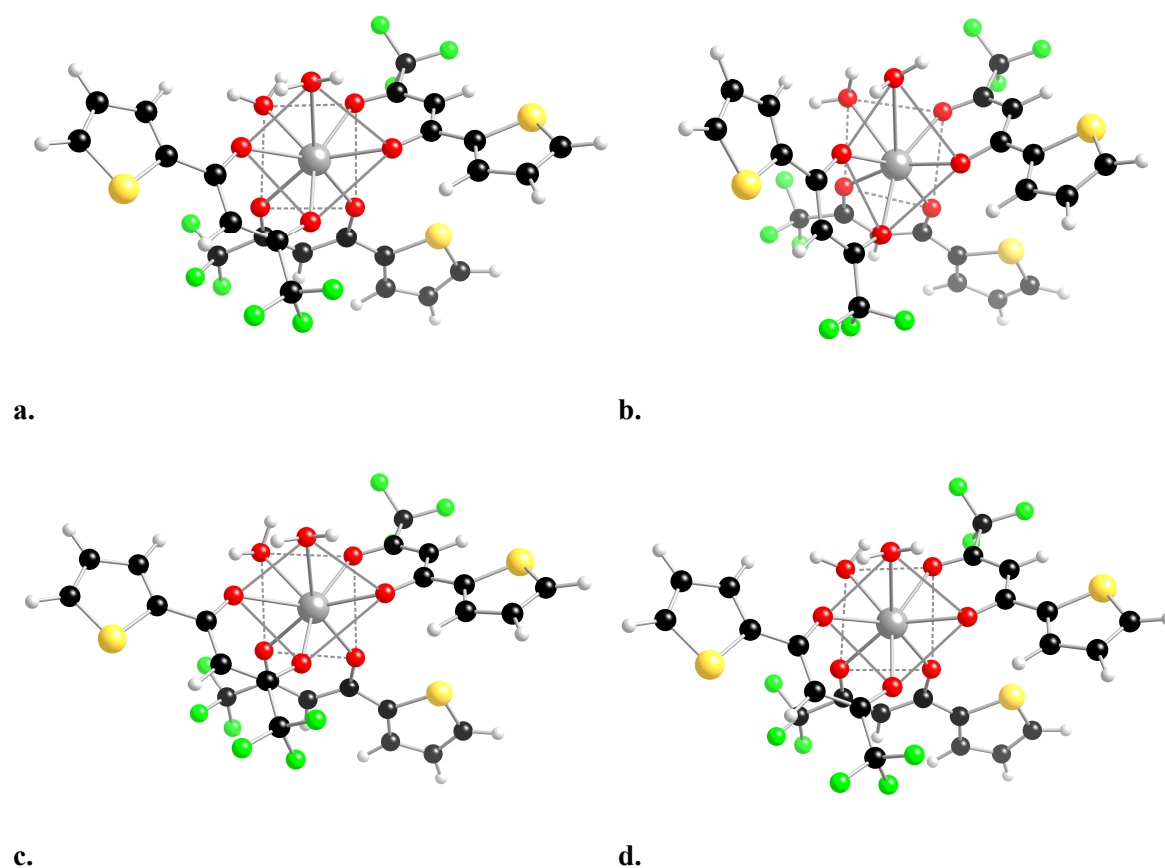

**Figure S4.** Perspective views of the QM/SPP structures of Isomer I in  $\text{CHCl}_3$  for Eu (a), U (b), Am (c), Cm (d), illustrating that Eu and Cm structures are very similar to the X-Ray one (see Fig. S1 a). In the U and Am structures the TTA ligand at the backside is rotated, resulting in a structure similar to the one in gas-phase for yttrium (see Fig. S2 b).

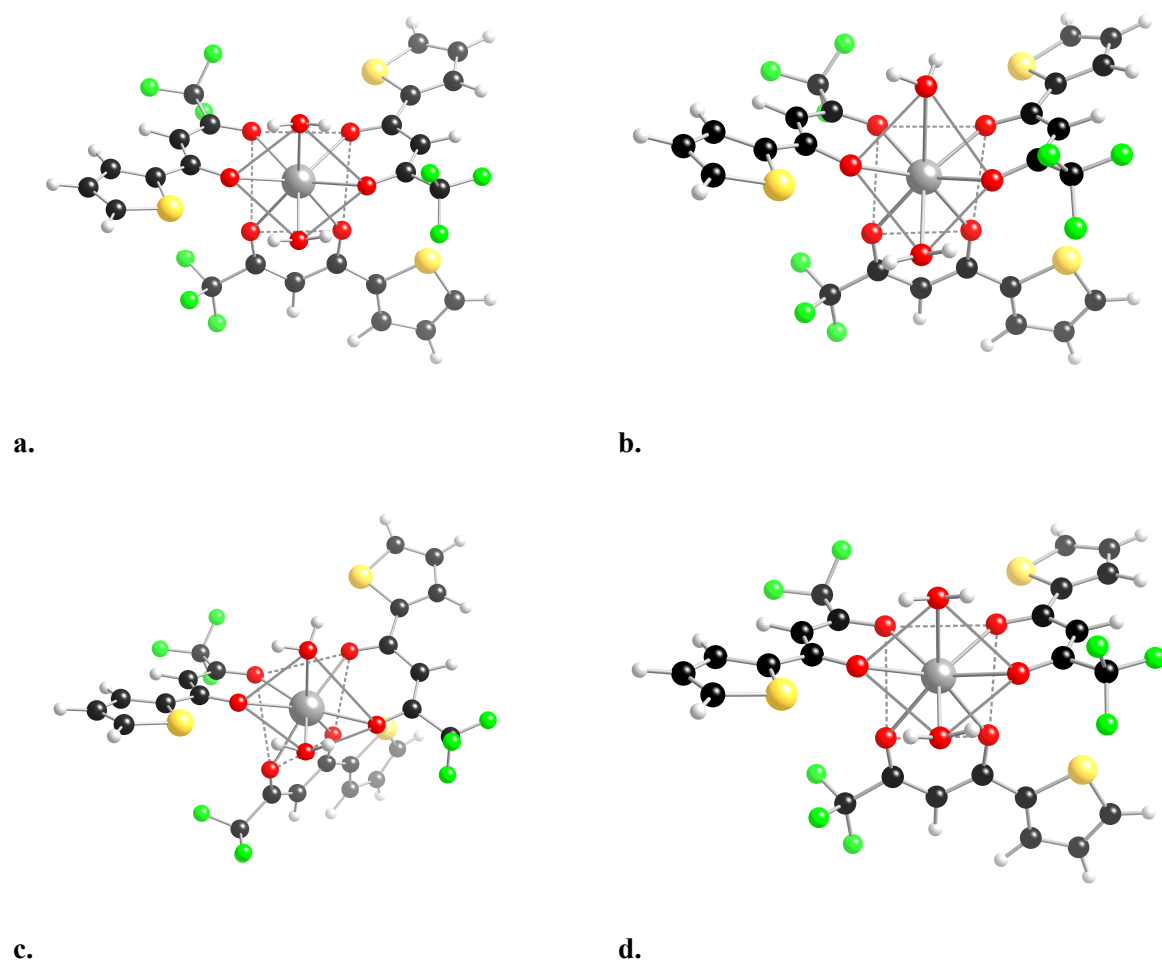

**Figure S5.** Perspective views of QM/SPP structures of Isomer II for Eu (a), U (b), Am (c), Cm (d) optimized in the CPCM model of CHCl<sub>3</sub>. The actinide structures are very similar but deviate significantly from that of Eu.

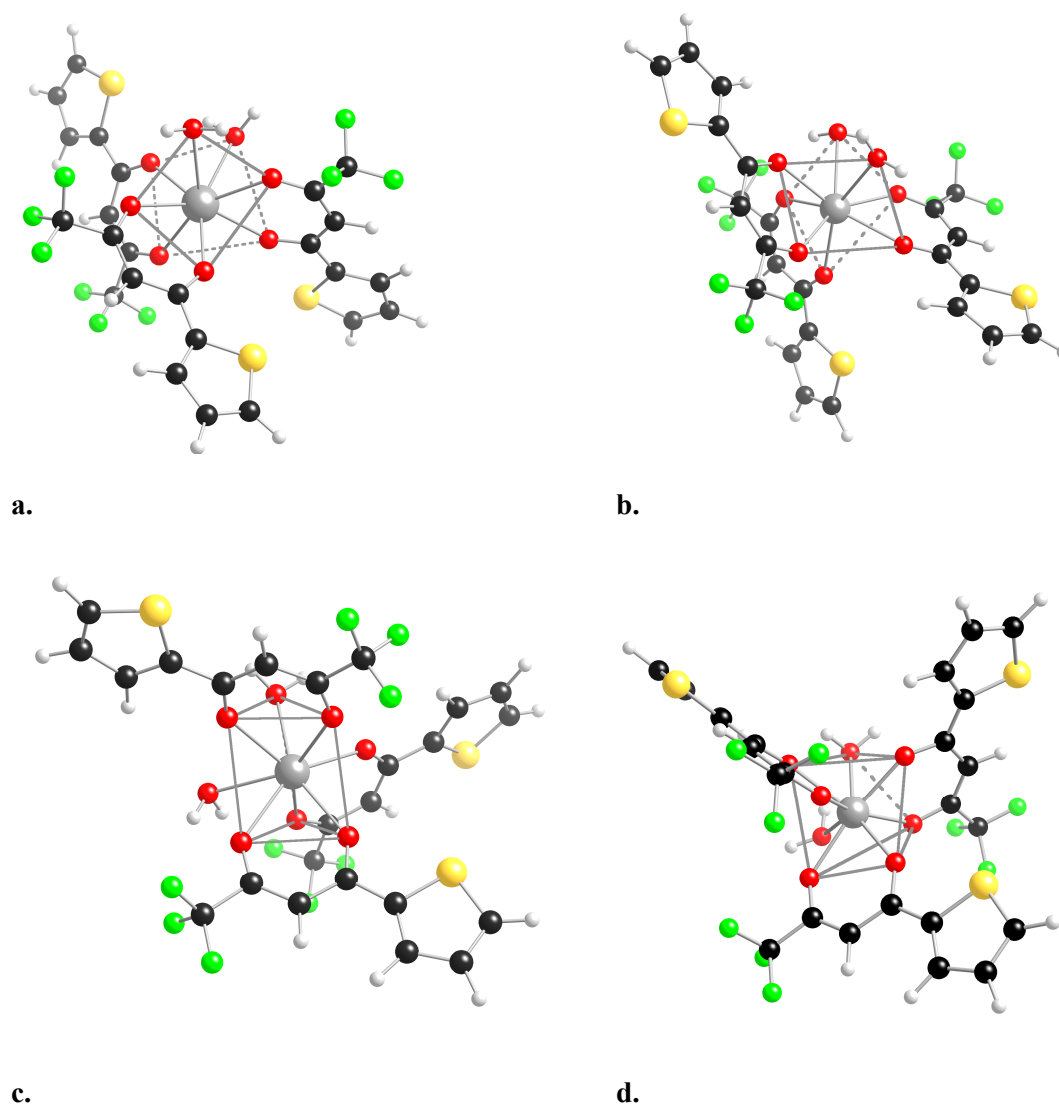

**Figure S6.** The structure of  $U(TTA)_3(OH_2)_2$ , calculated using the LPP potential and the chloroform CPCM solvent. Structure a. has been obtained using the isomer II as the starting structure for the geometry refinement and has been the ligand configuration found in Isomer II. Structure b. has been obtained using isomer I as the starting structure. The geometry has changed significantly and the square anti-prism geometry is strongly distorted. c. Is the same structure as b., but now viewed from a different angle, demonstrating that the geometry is close to bicapped trigonal prismatic. Figure d. shows the U(III) structure calculated using the SPP and Isomer I as the starting structure. It differs significantly from the corresponding LPP one (c) and is shown in a direction that demonstrates that it also can be described as a distorted bicapped trigonal prism.



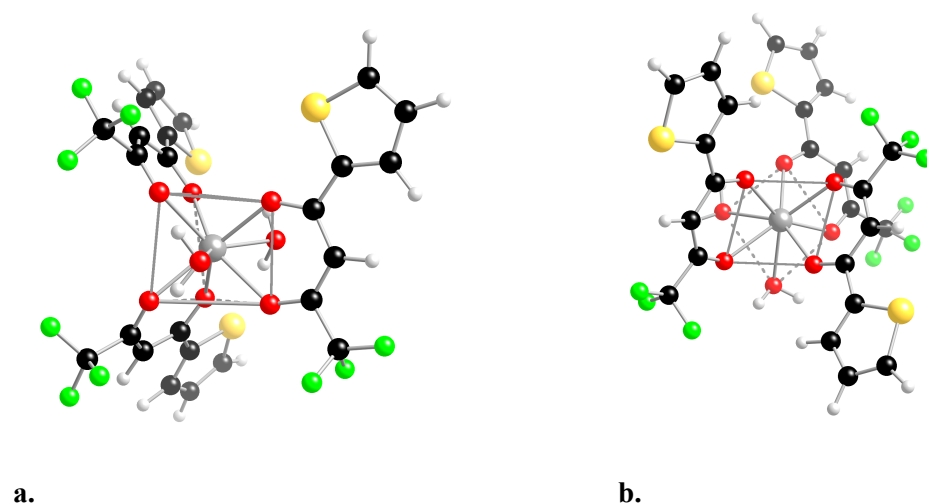

**Figure S7.** The QM/SPP structure of two  $Y(TTA)_3(OH_2)_2$  isomers with different TTA configurations from those in Isomers I and II, optimized in the CPCM model of  $CHCl_3$ . Structure (a) is closest to a bicapped trigonal prism geometry. The  $Y - O_{TTA}$  bond distances differ by less than  $0.01 \text{ \AA}$  from those in Isomer I and its electronic MP2 energies is  $7 \text{ kJ/mol}$  higher. The geometry of structure (b) is closest to a square anti-prism where the TTA ligands are all located along edges in the square faces, two in the upper one and the third in the lower one. The  $Y - O_{TTA}$  bond distances differ by less than  $0.01 \text{ \AA}$  from those in Isomer I and its electronic MP2 energies is  $8 \text{ kJ/mol}$  higher.

**Table S1.** Comparison of some interatomic distances in the triclinic (Isomer I) Y and Eu structures obtained from X-Ray and QM (DFT/BP86) calculations with the def2-TZVP basis sets. NPA charges were computed at the DFT level: q(M) is the net charge of the metal, n(p), n(d), n(f) are the population of the valence orbitals,  $\rho(M)$  is the spin density of the metal.

|                     | Y(TTA) <sub>3</sub> (OH) <sub>2</sub> |       |        | Eu(TTA) <sub>3</sub> (OH) <sub>2</sub> |        |        | U(TTA) <sub>3</sub> (OH) <sub>2</sub> |        |        | Am(TTA) <sub>3</sub> (OH) <sub>2</sub> |        |             | Cm(TTA) <sub>3</sub> (OH) <sub>2</sub> |        |        |             |
|---------------------|---------------------------------------|-------|--------|----------------------------------------|--------|--------|---------------------------------------|--------|--------|----------------------------------------|--------|-------------|----------------------------------------|--------|--------|-------------|
|                     | X-Ray                                 | GP    | QM/SPP | X-Ray                                  | QM/LPP | QM/SPP | QM/LPP                                | QM/SPP | QM/LPP | QM/SPP                                 | QM/LPP | QM/SPP      | QM/LPP                                 | QM/SPP | QM/LPP | QM/SPP      |
| Dist in Å           | tricl                                 | tricl | tricl  | tricl                                  | tricl  | tricl  | tricl                                 | tricl  | tricl  | tricl                                  | tricl  | tricl       | tricl                                  | tricl  | tricl  | tricl       |
| M-O1                | 2.340                                 | 2.327 | 2.339  | 2.389                                  | 2.377  | 2.388  | 2.523                                 | 2.283  | 2.462  | 2.386                                  | 2.424  | 2.387       | 2.462                                  | 2.386  | 2.424  | 2.387       |
| M-O2                | 2.313                                 | 2.279 | 2.315  | 2.369                                  | 2.445  | 2.466  | 2.510                                 | 2.341  | 2.466  | 2.587                                  | 2.487  | 2.453       | 2.466                                  | 2.587  | 2.487  | 2.453       |
| M-O3                | 2.335                                 | 2.321 | 2.352  | 2.380                                  | 2.369  | 2.335  | 2.495                                 | 2.270  | 2.440  | 2.349                                  | 2.415  | 2.381       | 2.440                                  | 2.349  | 2.415  | 2.381       |
| M-O4                | 2.270                                 | 2.288 | 2.308  | 2.330                                  | 2.421  | 2.403  | 2.552                                 | 2.303  | 2.491  | 2.397                                  | 2.472  | 2.439       | 2.491                                  | 2.397  | 2.472  | 2.439       |
| M-O5                | 2.355                                 | 2.383 | 2.359  | 2.405                                  | 2.397  | 2.354  | 2.502                                 | 2.237  | 2.457  | 2.368                                  | 2.447  | 2.404       | 2.457                                  | 2.368  | 2.447  | 2.404       |
| M-O6                | 2.379                                 | 2.336 | 2.310  | 2.419                                  | 2.366  | 2.334  | 2.474                                 | 2.247  | 2.428  | 2.346                                  | 2.416  | 2.373       | 2.428                                  | 2.346  | 2.416  | 2.373       |
| M-O7 <sub>wat</sub> | 2.349                                 | 2.608 | 2.505  | 2.408                                  | 2.586  | 3.865  | 2.665                                 | 2.854  | 2.607  | 2.658                                  | 2.627  | 2.618       | 2.607                                  | 2.658  | 2.627  | 2.618       |
| M-O8 <sub>wat</sub> | 2.373                                 | 2.501 | 2.498  | 2.424                                  | 2.506  | 2.476  | 2.688                                 | 2.590  | 2.628  | 2.558                                  | 2.548  | 2.532       | 2.628                                  | 2.558  | 2.548  | 2.532       |
| M-S1                | 5.044                                 | 5.015 | 5.057  | 5.098                                  | 5.105  | 5.070  | 5.187                                 | 4.992  | 5.153  | 5.079                                  | 5.149  | 5.110       | 5.153                                  | 5.079  | 5.149  | 5.110       |
| M-S2                | 6.139                                 | 6.184 | 6.216  | 6.199                                  | 6.284  | 6.260  | 6.399                                 | 6.237  | 6.348  | 6.408                                  | 6.328  | 6.289       | 6.348                                  | 6.408  | 6.328  | 6.289       |
| M-S3                | 6.069                                 | 6.201 | 6.175  | 6.086                                  | 6.265  | 6.237  | 6.391                                 | 6.148  | 6.335  | 6.232                                  | 6.316  | 6.273       | 6.335                                  | 6.232  | 6.316  | 6.273       |
| q(M)                | -                                     | 1.35  | 1.35   | -                                      | 1.26   | 1.52   | 2.23                                  | 1.29   | 2.19   | 1.36                                   | 1.59   | <b>1.41</b> | 2.19                                   | 1.36   | 1.59   | <b>1.41</b> |
| n(p)                | -                                     | 0.42  | 0.42   | -                                      | 6.35   | 6.24   | 5.98                                  | 6.34   | 5.99   | 6.35                                   | 6.28   | 6.36        | 5.99                                   | 6.35   | 6.28   | 6.36        |
| n(d)                | -                                     | 0.99  | 0.98   | -                                      | 1.02   | 0.74   | 0.60                                  | 1.03   | 0.72   | 0.79                                   | 0.90   | 0.80        | 0.72                                   | 0.79   | 0.90   | 0.80        |
| n(f)                | -                                     | -     | -      | -                                      | 6.20   | 6.32   | 3.02                                  | 3.10   | 6.02   | 6.29                                   | 7.02   | 7.21        | 6.02                                   | 6.29   | 7.02   | 7.21        |
| $\rho(M)$           | -                                     | -     | -      | -                                      | -      | 6.24   | -                                     | 2.12   | -      | 6.01                                   | -      | 6.91        | -                                      | 6.01   | -      | 6.91        |

**Table S2.** Comparison of some interatomic distances in the monoclinic (ISOMER II) Y and Eu structures obtained from X-Ray and QM (DFT/BP86) calculations with the def2-TZVP basis sets. NPA charges were computed at the DFT level:  $q(M)$  is the net charge of the metal,  $n(p)$ ,  $n(d)$ ,  $n(f)$  are the population of the valence orbitals,  $\rho(M)$  is the spin density of the metal. The X-ray data are from White<sup>25</sup> that does not report any uncertainty in the bond distances due to uncertainties in the data collection. Based on his discussion we estimate the uncertainty in the M – O distances to at least 0.02 Å.

|                    | Y(TTA) <sub>3</sub> (OH <sub>2</sub> ) <sub>2</sub> |                   |       | Eu(TTA) <sub>3</sub> (OH <sub>2</sub> ) <sub>2</sub> |                   |            | U(TTA) <sub>3</sub> (OH <sub>2</sub> ) <sub>2</sub> |                   |            | Am(TTA) <sub>3</sub> (OH <sub>2</sub> ) <sub>2</sub> |                   |            | Cm(TTA) <sub>3</sub> (OH <sub>2</sub> ) <sub>2</sub> |                   |            |
|--------------------|-----------------------------------------------------|-------------------|-------|------------------------------------------------------|-------------------|------------|-----------------------------------------------------|-------------------|------------|------------------------------------------------------|-------------------|------------|------------------------------------------------------|-------------------|------------|
|                    | QM/SPP                                              |                   | X-Ray | QM/LPP                                               |                   | QM/SPP     | QM/LPP                                              |                   | QM/SPP     | QM/LPP                                               |                   | QM/SPP     | QM/LPP                                               |                   | QM/SPP     |
|                    | GP                                                  | CHCl <sub>3</sub> |       | GP                                                   | CHCl <sub>3</sub> |            | CHCl <sub>3</sub>                                   | CHCl <sub>3</sub> |            | CHCl <sub>3</sub>                                    | CHCl <sub>3</sub> |            | CHCl <sub>3</sub>                                    | CHCl <sub>3</sub> |            |
|                    | mono                                                | mono              | mono  | mono                                                 | dist. mono        | dist. mono | dist. mono                                          | dist. mono        | dist. mono | dist. mono                                           | dist. mono        | dist. mono | dist. mono                                           | dist. mono        | dist. mono |
| M-O1               | 2.328                                               | 2.300             | 2.50  | 2.350                                                | 2.363             | 2.347      | 2.483                                               | 2.313             | 2.432      | 2.377                                                | 2.419             | 2.374      | 2.419                                                | 2.374             |            |
| M-O2               | 2.370                                               | 2.398             | 2.38  | 2.474                                                | 2.459             | 2.509      | 2.550                                               | 2.338             | 2.496      | 2.400                                                | 2.504             | 2.472      | 2.504                                                | 2.472             |            |
| M-O3               | 2.402                                               | 2.407             | 2.39  | 2.493                                                | 2.457             | 2.431      | 2.538                                               | 2.278             | 2.484      | 2.567                                                | 2.495             | 2.469      | 2.495                                                | 2.469             |            |
| M-O4               | 2.303                                               | 2.301             | 2.38  | 2.344                                                | 2.360             | 2.387      | 2.488                                               | 2.278             | 2.436      | 2.348                                                | 2.405             | 2.366      | 2.405                                                | 2.366             |            |
| M-O5               | 2.289                                               | 2.316             | 2.47  | 2.362                                                | 2.376             | 2.392      | 2.487                                               | 2.273             | 2.437      | 2.348                                                | 2.421             | 2.383      | 2.421                                                | 2.383             |            |
| M-O6               | 2.307                                               | 2.311             | 2.38  | 2.362                                                | 2.377             | 2.367      | 2.515                                               | 2.314             | 2.464      | 2.386                                                | 2.432             | 2.388      | 2.432                                                | 2.388             |            |
| M-O <sub>wat</sub> | 2.557                                               | 2.505             | 2.51  | 2.609                                                | 2.571             | 2.588      | 2.678                                               | 2.660             | 2.625      | 2.661                                                | 2.612             | 2.601      | 2.612                                                | 2.601             |            |
| M-O <sub>wat</sub> | 2.453                                               | 2.441             | 2.55  | 2.520                                                | 2.506             | 2.545      | 2.675                                               | 2.582             | 2.618      | 2.557                                                | 2.547             | 2.529      | 2.547                                                | 2.529             |            |
| M-S1               | 5.052                                               | 5.034             | 5.25  | 5.064                                                | 5.087             | 5.050      | 5.198                                               | 5.060             | 5.157      | 5.108                                                | 5.139             | 5.097      | 5.139                                                | 5.097             |            |
| M-S2               | 5.168                                               | 5.180             | 5.13  | 5.254                                                | 5.219             | 5.175      | 5.272                                               | 5.041             | 5.225      | 5.346                                                | 5.247             | 5.228      | 5.247                                                | 5.228             |            |
| M-S3               | 5.032                                               | 5.069             | 5.15  | 5.098                                                | 5.116             | 5.132      | 5.203                                               | 5.011             | 5.162      | 5.082                                                | 5.152             | 5.122      | 5.152                                                | 5.122             |            |
| q(M)               | 1.34                                                | 1.34              | -     | 1.26                                                 | 1.26              | 1.40       | 2.24                                                | 1.25              | 2.11       | 1.36                                                 | 1.59              | 1.40       | 1.59                                                 | 1.40              |            |
| n(p)               | 6.43                                                | 6.43              | -     | 6.34                                                 | 6.35              | 6.29       | 5.98                                                | 6.37              | 5.98       | 6.36                                                 | 6.28              | 6.37       | 6.28                                                 | 6.37              |            |
| n(d)               | 0.98                                                | 0.98              | -     | 1.03                                                 | 1.03              | 0.81       | 0.60                                                | 1.08              | 0.71       | 0.79                                                 | 0.90              | 0.80       | 0.90                                                 | 0.80              |            |
| n(f)               | -                                                   | -                 | -     | 6.19                                                 | 6.19              | 6.32       | 3.03                                                | 3.11              | 6.02       | 6.29                                                 | 7.02              | 7.21       | 7.02                                                 | 7.21              |            |
| ρ(M)               | -                                                   | -                 | -     | -                                                    | -                 | 6.25       | -                                                   | 2.20              | -          | 6.01                                                 | -                 | 6.91       | -                                                    | 6.91              |            |

**Table S3** Average M - O<sub>TTA</sub> distances in Å in the X-ray structures and corresponding QM values obtained using the LPP and SPP potentials in the QM calculations, with the def-TZVP basis sets.  $\Delta$  denotes the difference in the average distance in the various structures obtained using the two core potentials.

| Metal ion | X-ray | LPP   | SPP   | $\Delta(\text{LPP} - \text{SPP})$ |
|-----------|-------|-------|-------|-----------------------------------|
| Isomer II |       |       |       |                                   |
| Y         | -     | -     | 2.379 | -                                 |
| Eu        | 2.44  | 2.425 | 2.432 | -0.010                            |
| U         | -     | 2.551 | 2.377 | 0.173                             |
| Am        | -     | 2.498 | 2.453 | 0.044                             |
| Cm        | -     | 2.479 | 2.447 | 0.032                             |
| Isomer I  |       |       |       |                                   |
| Y         | 2.332 | 2.379 | -     | -                                 |
| Eu        | 2.382 | 2.432 | 2.446 | -0.014                            |
| U         | -     | 2.550 | 2.392 | 0.158                             |
| Am        | -     | 2.497 | 2.454 | 0.043                             |
| Cm        | -     | 2.478 | 2.447 | 0.031                             |

**Table S4** Relative electronic and Gibbs energies in kJ/mol between isomers I and II,  $E(\text{IsomII}) - E(\text{IsomI})$ , computed at the MP2 level from structures optimized with the LPP and SPP pseudopotentials, in the gas-phase, or solvent models of carbon tetrachloride, chloroform and water, using the def-TZVP basis sets.

| Complex                                              | ECP | Gas-phase  |                  | CCl <sub>4</sub> | CHCl <sub>3</sub> | Water      |
|------------------------------------------------------|-----|------------|------------------|------------------|-------------------|------------|
|                                                      |     | $\Delta E$ | $\Delta G^\circ$ | $\Delta E$       | $\Delta E$        | $\Delta E$ |
| Y(TTA) <sub>3</sub> (OH <sub>2</sub> ) <sub>2</sub>  | SPP | -0.5       | -0.3             | -4.7             | -3.9              | -6.4       |
| Eu(TTA) <sub>3</sub> (OH <sub>2</sub> ) <sub>2</sub> | LPP | -2.2       | -1.6             | -                | -7.5              | -          |
|                                                      | SPP | -          | -                | -                | -9.3              | -          |
| U(TTA) <sub>3</sub> (OH <sub>2</sub> ) <sub>2</sub>  | LPP | -6.7       | -3.4             | -                | -14.7             | -          |
|                                                      | SPP | -          | -                | -                | -21.0             | -          |
| Am(TTA) <sub>3</sub> (OH <sub>2</sub> ) <sub>2</sub> | LPP | -5.5       | -0.7             | -                | -13.0             | -          |
|                                                      | SPP | -          | -                | -                | -13.5             | -          |
| Cm(TTA) <sub>3</sub> (OH <sub>2</sub> ) <sub>2</sub> | LPP | -5.3       | -0.2             | -                | -7.6              | -          |
|                                                      | SPP | -          | -                | -                | -7.6              | -          |

**Table S5.** Relative energies in kJ/mol of various  $Y(TTA)_3(OH_2)_2$  isomers (computed at the MP2 level with the COSMO solvent model for  $CH_3Cl$  with the def2-TZVP basis sets) calculated relative to the energy of Isomer I.

| Complex                        | $\Delta E$ (kJ/mol) |
|--------------------------------|---------------------|
| $Y(TTA)_3$ – Isomer I          | 0.0                 |
| $Y(TTA)_3$ – Isomer I / flip1  | 4.8                 |
| $Y(TTA)_3$ – Isomer I / flip2  | 8.4                 |
| $Y(TTA)_3$ – Isomer I / flip3  | -4.0                |
| $Y(TTA)_3$ – Isomer II         | -3.2                |
| $Y(TTA)_3$ – Isomer II / flip1 | -8.9                |
| $Y(TTA)_3$ – Isomer II / flip2 | -2.4                |
| $Y(TTA)_3$ – Isomer II / flip3 | 1.9                 |

**Table S6.** Cartesian coordinates in Angstroms of the QM structures reported in Fig. 2 and S1-S4.**Isomer II / flip2 Y(TTA)<sub>3</sub>(OH)<sub>2</sub> optimized with the QM/SPP in the chloroform CPCM solvent (Fig. 2)**

| Atom | X(Å)       | Y(Å)       | Z(Å)       |
|------|------------|------------|------------|
| S    | -1.6727971 | 3.0416971  | -3.3413608 |
| C    | -1.4782582 | 3.9048101  | -1.8419509 |
| C    | -1.6452092 | 5.2710265  | -2.0361343 |
| C    | -1.9252681 | 5.6074370  | -3.3801169 |
| C    | -1.9703801 | 4.4954596  | -4.1997113 |
| C    | -1.1774053 | 3.1375953  | -0.6339583 |
| C    | -1.0353182 | 3.8294861  | 0.6060343  |
| C    | -0.8045294 | 3.1910891  | 1.8161543  |
| C    | -0.7560669 | 4.0511590  | 3.0986509  |
| F    | -0.8490657 | 5.3864334  | 2.8764154  |
| O    | -1.0757502 | 1.8711744  | -0.7607106 |
| Y    | -0.2959872 | 0.1301982  | 0.5063467  |
| O    | -0.6500753 | 1.9442769  | 2.0482790  |
| O    | -0.8312264 | -2.0356948 | 1.4013000  |
| C    | -1.2682562 | -3.1227701 | 0.8854650  |
| C    | -1.7622462 | -3.2316275 | -0.4437456 |
| C    | -1.8410287 | -2.1566218 | -1.3256534 |
| C    | -2.4519155 | -2.4094876 | -2.7259878 |
| F    | -2.7884056 | -3.7076412 | -2.9543547 |
| C    | -1.2722901 | -4.3148969 | 1.7386323  |
| S    | -0.6803626 | -4.1686517 | 3.3692870  |
| C    | -0.9810283 | -5.8269748 | 3.6905179  |
| C    | -1.5147492 | -6.4779230 | 2.5959615  |
| C    | -1.6811874 | -5.6176161 | 1.4851518  |
| O    | -1.4912094 | -0.9490617 | -1.1492339 |
| O    | -2.5945200 | 0.1672256  | 1.4939614  |
| O    | 0.7840158  | -0.2876270 | 2.6532309  |
| O    | 1.5981616  | 1.4502229  | 0.2753007  |
| C    | 2.7902445  | 1.2338263  | -0.1083579 |
| C    | 3.3345819  | 0.0576032  | -0.6132202 |
| C    | 2.5568247  | -1.1220430 | -0.7778048 |
| C    | 3.1848087  | -2.3175118 | -1.3431199 |
| O    | 1.3203101  | -1.2034700 | -0.4611138 |
| F    | -3.5808200 | -1.6694719 | -2.8945205 |
| F    | -1.5826166 | -2.0452022 | -3.7036605 |
| C    | 3.7073892  | 2.4730405  | 0.0187112  |
| F    | 0.3975533  | 3.8368540  | 3.7841526  |
| F    | -1.7820629 | 3.7122894  | 3.9334791  |
| H    | 4.3808716  | 0.0487028  | -0.9025450 |
| H    | -2.1653632 | 4.4619831  | -5.2684982 |
| H    | -2.0875484 | 6.6236211  | -3.7358659 |
| H    | -1.5661218 | 6.0054094  | -1.2364940 |
| H    | -1.1443863 | 4.9098140  | 0.6123277  |
| H    | -2.1177422 | -4.1984714 | -0.7865076 |
| H    | -2.0874286 | -5.9434915 | 0.5292826  |
| H    | -1.7759262 | -7.5349779 | 2.5951820  |
| H    | -0.7495671 | -6.2397701 | 4.6688153  |
| H    | -2.5934513 | 0.8384043  | 2.2026302  |

|   |            |            |            |
|---|------------|------------|------------|
| H | -2.8865862 | -0.6648842 | 1.9071196  |
| H | 0.3879699  | -1.0943357 | 3.0357775  |
| H | 0.5640874  | 0.4543288  | 3.2497723  |
| C | 4.4851453  | -2.5393770 | -1.7796467 |
| C | 4.6891626  | -3.8517286 | -2.2650837 |
| C | 3.5430088  | -4.6200976 | -2.1951479 |
| S | 2.2171185  | -3.7508153 | -1.5410276 |
| H | 5.2650903  | -1.7804284 | -1.7513786 |
| H | 5.6377789  | -4.2205501 | -2.6520155 |
| H | 3.4140066  | -5.6556946 | -2.4989262 |
| F | 3.7680795  | 2.8956194  | 1.3096976  |
| F | 3.2253669  | 3.5069625  | -0.7202112 |
| F | 4.9861639  | 2.2523304  | -0.3892123 |

**Isomer I, of Y(TTA)<sub>3</sub>(OH)<sub>2</sub> optimized with the QM/SPP in gas phase (Fig. S2b)**

| Atom | X(Å)       | Y(Å)       | Z(Å)       |
|------|------------|------------|------------|
| C    | -1.9517644 | 2.0412756  | -4.4248655 |
| C    | -1.1337365 | 1.7016205  | -3.3543932 |
| S    | 0.4142061  | 2.4824891  | -3.4896449 |
| C    | -0.0423198 | 3.2453582  | -4.9541795 |
| C    | -1.3297476 | 2.9221568  | -5.3372016 |
| C    | -1.3750719 | 0.8331154  | -2.2025742 |
| C    | -2.6218763 | 0.1568185  | -2.0872361 |
| C    | -2.9139867 | -0.6971896 | -1.0311867 |
| O    | -2.1712394 | -1.0110856 | -0.0439877 |
| Y    | -0.0506396 | -0.3349689 | 0.6332583  |
| O    | 1.2378841  | -0.7597705 | 2.7343112  |
| O    | 0.0093261  | -2.6504270 | 0.7832130  |
| C    | 0.8377061  | -3.5727172 | 0.4803710  |
| C    | 2.0671725  | -3.3405702 | -0.1961143 |
| C    | 2.4679222  | -2.0744721 | -0.6102182 |
| O    | 1.8572487  | -0.9694592 | -0.4592476 |
| C    | 0.4647517  | -4.9457851 | 0.8524728  |
| S    | 1.5127151  | -6.3185575 | 0.6283123  |
| C    | 0.3482422  | -7.3949055 | 1.2794261  |
| C    | -0.8059668 | -6.7385257 | 1.6556407  |
| C    | -0.7375282 | -5.3475566 | 1.4141206  |
| C    | 3.8135093  | -1.9338973 | -1.3616441 |
| F    | 4.6461854  | -1.0933848 | -0.6917789 |
| F    | 3.6196675  | -1.4139273 | -2.5985187 |
| F    | 4.4727878  | -3.1123514 | -1.5156971 |
| O    | -1.3613246 | 1.3732415  | 1.6549096  |
| C    | -1.1903591 | 2.6317601  | 1.7917206  |
| C    | -0.0314530 | 3.3619554  | 1.5660606  |
| C    | 1.2078057  | 2.7462593  | 1.2197428  |
| C    | 2.4163771  | 3.5669988  | 1.0736099  |
| S    | 2.4750983  | 5.2755857  | 1.4069191  |
| C    | 4.1332387  | 5.3626354  | 0.9809165  |
| C    | 4.6325777  | 4.1346073  | 0.5948099  |
| C    | 3.6571222  | 3.1138501  | 0.6486715  |
| O    | 1.3465628  | 1.4911589  | 1.0473105  |
| O    | -0.4303623 | 0.7254266  | -1.3475233 |



|   |            |            |            |
|---|------------|------------|------------|
| O | -1.5268921 | -1.0520450 | 2.6601138  |
| C | -2.4541882 | 3.3742888  | 2.2812491  |
| F | -3.4670938 | 3.2357307  | 1.3908499  |
| F | -2.8775567 | 2.8496493  | 3.4637034  |
| F | -2.2612353 | 4.7032799  | 2.4751124  |
| C | -4.2909995 | -1.3991835 | -1.0063576 |
| F | -4.9227347 | -1.1695052 | 0.1743216  |
| F | -4.1402343 | -2.7443805 | -1.1280153 |
| F | -5.1251599 | -0.9943454 | -1.9973475 |
| H | 4.6568467  | 6.3130490  | 1.0369392  |
| H | 5.6638145  | 3.9806743  | 0.2821425  |
| H | 3.8215911  | 2.0728864  | 0.3774450  |
| H | 2.7135457  | -4.1843273 | -0.4243211 |
| H | -0.0669145 | 4.4394436  | 1.7075513  |
| H | 0.5727776  | -8.4553321 | 1.3533770  |
| H | -1.6678965 | -7.2445468 | 2.0868695  |
| H | -1.5362948 | -4.6400039 | 1.6231686  |
| H | -3.3767810 | 0.3038625  | -2.8529829 |
| H | -2.9670702 | 1.6679617  | -4.5444868 |
| H | -1.8039131 | 3.3051186  | -6.2391521 |
| H | 0.6601892  | 3.8957384  | -5.4681779 |
| H | 0.5459473  | -0.9959212 | 3.3820783  |
| H | 1.6609965  | 0.0612266  | 3.0415435  |
| H | -2.0061076 | -0.1933452 | 2.6428576  |
| H | -2.1002248 | -1.6741882 | 2.1723734  |

**Isomer I, of Y(TTA)<sub>3</sub>(OH<sub>2</sub>)<sub>2</sub> optimized with the QM/SPP in the chloroform CPCM solvent (Fig. S2c)**

| Atom | X(Å)       | Y(Å)       | Z(Å)       |
|------|------------|------------|------------|
| C    | -4.4159090 | 2.2372773  | -1.7855377 |
| C    | -3.1352822 | 2.0831811  | -1.2682224 |
| S    | -2.1671560 | 3.4928053  | -1.5920336 |
| C    | -3.4661182 | 4.2630972  | -2.4040175 |
| C    | -4.6042206 | 3.4798995  | -2.4330698 |
| C    | -2.5247526 | 0.9705006  | -0.5400642 |
| C    | -3.3102090 | -0.1887854 | -0.2614761 |
| C    | -2.8163190 | -1.2599574 | 0.4669126  |
| O    | -1.6427538 | -1.4198022 | 0.9459869  |
| Y    | 0.3536156  | -0.2175790 | 0.7425679  |
| O    | 2.5871632  | -0.3638340 | 1.8525383  |
| O    | 1.2212724  | -2.3994883 | 0.8855769  |
| C    | 1.3103736  | -3.4050096 | 0.1015509  |
| C    | 1.0121272  | -3.3453783 | -1.2879694 |
| C    | 0.6312633  | -2.1693961 | -1.9266753 |
| O    | 0.4447213  | -1.0182308 | -1.4204207 |
| C    | 1.7596559  | -4.6710607 | 0.6941306  |
| S    | 2.0724737  | -6.1096071 | -0.2380774 |
| C    | 2.5015648  | -7.0013291 | 1.1616963  |
| C    | 2.4111829  | -6.2361757 | 2.3078897  |
| C    | 1.9910752  | -4.9127352 | 2.0413051  |
| C    | 0.4033639  | -2.2063999 | -3.4566572 |
| F    | 1.2479473  | -1.3453640 | -4.0858822 |

|   |            |            |            |
|---|------------|------------|------------|
| F | -0.8633077 | -1.8229243 | -3.7638760 |
| F | 0.5964692  | -3.4324366 | -4.0102687 |
| O | 0.3149456  | 1.5960649  | 2.2499362  |
| C | 0.6522758  | 2.8187695  | 2.0978146  |
| C | 1.3391026  | 3.4036735  | 1.0442274  |
| C | 1.8242257  | 2.6719574  | -0.0843592 |
| C | 2.6074386  | 3.3701544  | -1.1119370 |
| S | 3.0405336  | 5.0557907  | -1.0197072 |
| C | 3.8694236  | 4.9902404  | -2.5190473 |
| C | 3.8227552  | 3.7282237  | -3.0788115 |
| C | 3.1067066  | 2.8087349  | -2.2789326 |
| O | 1.6307927  | 1.4274293  | -0.2577549 |
| O | -1.3111042 | 1.1040052  | -0.1736359 |
| O | -0.0959375 | -0.8986508 | 3.1106908  |
| C | 0.2324776  | 3.7112746  | 3.2864293  |
| F | -1.1146247 | 3.6701991  | 3.4679979  |
| F | 0.8028917  | 3.2656266  | 4.4417281  |
| F | 0.5787889  | 5.0162134  | 3.1483351  |
| C | -3.7650011 | -2.4354947 | 0.7878340  |
| F | -3.8655353 | -2.6115658 | 2.1361095  |
| F | -3.2891443 | -3.5980474 | 0.2694900  |
| F | -5.0261966 | -2.2707314 | 0.3124345  |
| H | 4.3483742  | 5.8838892  | -2.9105015 |
| H | 4.2879545  | 3.4802428  | -4.0314299 |
| H | 2.9425453  | 1.7624540  | -2.5285855 |
| H | 1.1106428  | -4.2472768 | -1.8872952 |
| H | 1.5395320  | 4.4711868  | 1.0989223  |
| H | 2.7989721  | -8.0424637 | 1.0680693  |
| H | 2.6378780  | -6.6198299 | 3.3012765  |
| H | 1.8435015  | -4.1463258 | 2.7996014  |
| H | -4.3419223 | -0.2215443 | -0.5979094 |
| H | -5.1926087 | 1.4791424  | -1.7016951 |
| H | -5.5361001 | 3.7904178  | -2.9028746 |
| H | -3.3292528 | 5.2571132  | -2.8218986 |
| H | 2.6240700  | -1.3076100 | 2.1052057  |
| H | 2.7348995  | 0.1454006  | 2.6687852  |
| H | -0.3211348 | -0.0500401 | 3.5417233  |
| H | -0.9295187 | -1.4055847 | 3.0515898  |

**Isomer II, of Eu(TTA)<sub>3</sub>(OH)<sub>2</sub> optimized with the QM/LPP in gas phase (Fig. S3b)**

| Atom | X(Å)       | Y(Å)      | Z(Å)       |
|------|------------|-----------|------------|
| S    | 2.2780234  | 2.9796532 | -3.1861531 |
| C    | 0.7941514  | 3.6800154 | -2.6093480 |
| C    | 0.6719030  | 4.9967537 | -3.0369556 |
| C    | 1.7667887  | 5.4270089 | -3.8184532 |
| C    | 2.7136300  | 4.4335513 | -3.9797802 |
| C    | -0.0899970 | 2.8472422 | -1.7931502 |
| C    | -1.3194057 | 3.4026001 | -1.3201450 |
| C    | -2.2569301 | 2.6966616 | -0.5807423 |
| C    | -3.5788899 | 3.4039937 | -0.2070293 |
| F    | -3.6239702 | 4.7132111 | -0.5566778 |
| O    | 0.2898555  | 1.6540641 | -1.5593915 |

|    |            |            |            |
|----|------------|------------|------------|
| Eu | -0.3464230 | -0.1446342 | -0.1870487 |
| O  | -2.2079897 | 1.4843833  | -0.1726457 |
| O  | -1.3066943 | -2.4398898 | -0.3482052 |
| C  | -0.7842908 | -3.5597006 | -0.7035940 |
| C  | 0.4280860  | -3.6832778 | -1.4281081 |
| C  | 1.2018956  | -2.6034336 | -1.8566720 |
| C  | 2.4501820  | -2.9014749 | -2.7266973 |
| F  | 2.7060438  | -4.2301649 | -2.8688935 |
| C  | -1.5238559 | -4.7765154 | -0.3525531 |
| S  | -3.0388353 | -4.6053870 | 0.4860825  |
| C  | -3.2675977 | -6.3044208 | 0.5442924  |
| C  | -2.2273646 | -6.9867703 | -0.0522832 |
| C  | -1.2357923 | -6.1174712 | -0.5632882 |
| O  | 1.0172648  | -1.3654519 | -1.6516228 |
| O  | -2.0720444 | -0.4985224 | -2.1116904 |
| O  | -2.1328714 | -0.5823077 | 1.5356000  |
| O  | 0.4950591  | 1.3867495  | 1.4024509  |
| C  | 1.1772236  | 1.3522667  | 2.4841510  |
| C  | 1.7410160  | 0.1648084  | 3.0252072  |
| C  | 1.6018007  | -1.0779641 | 2.4144870  |
| C  | 2.2558619  | -2.3079598 | 3.0894247  |
| F  | 2.9252282  | -2.0049220 | 4.2343200  |
| O  | 0.9876593  | -1.3589569 | 1.3368015  |
| F  | 2.2838576  | -2.3884277 | -3.9731579 |
| F  | 3.5545283  | -2.3318804 | -2.1917907 |
| C  | 1.3774982  | 2.6221481  | 3.1868902  |
| C  | 2.0610844  | 2.9168121  | 4.3592659  |
| C  | 2.0102728  | 4.2874117  | 4.7002243  |
| C  | 1.2877753  | 5.0264318  | 3.7843578  |
| S  | 0.6707331  | 4.0598804  | 2.5103041  |
| F  | 1.3120093  | -3.2310775 | 3.4087985  |
| F  | 3.1397103  | -2.9011193 | 2.2503267  |
| F  | -3.8054359 | 3.3319169  | 1.1286712  |
| F  | -4.6270984 | 2.7853383  | -0.8253247 |
| H  | 2.3076724  | 0.2221680  | 3.9490694  |
| H  | 2.5818761  | 2.1674157  | 4.9522810  |
| H  | 2.4836993  | 4.7169945  | 5.5814004  |
| H  | 1.0892943  | 6.0945923  | 3.7999369  |
| H  | 3.6481939  | 4.4901612  | -4.5313219 |
| H  | 1.8598613  | 6.4232577  | -4.2472390 |
| H  | -0.1798662 | 5.6292731  | -2.7941051 |
| H  | -1.5522434 | 4.4323034  | -1.5733551 |
| H  | 0.7673291  | -4.6786250 | -1.6971211 |
| H  | -0.3341938 | -6.4630653 | -1.0651774 |
| H  | -2.1805342 | -8.0724111 | -0.1173206 |
| H  | -4.1550736 | -6.7175369 | 1.0152869  |
| H  | -2.8190579 | 0.0955404  | -1.9126116 |
| H  | -2.3707426 | -1.4080092 | -1.9171337 |
| H  | -2.4999005 | -1.4639510 | 1.3327437  |
| H  | -2.8093968 | 0.0913802  | 1.3198817  |

**Isomer II, of Eu(TTA)<sub>3</sub>(OH)<sub>2</sub> optimized with the QM/LPP in the chloroform CPCM solvent (Fig. S3c)**

| Atom | X(Å)       | Y(Å)       | Z(Å)       |
|------|------------|------------|------------|
| S    | 2.2658487  | 2.8223603  | -3.2160040 |
| C    | 0.8258128  | 3.5893759  | -2.6086708 |
| C    | 0.7594238  | 4.9125058  | -3.0294343 |
| C    | 1.8603627  | 5.2932981  | -3.8301316 |
| C    | 2.7571716  | 4.2578558  | -4.0137930 |
| C    | -0.0836386 | 2.7980400  | -1.7792694 |
| C    | -1.2694223 | 3.4152750  | -1.2773163 |
| C    | -2.2227140 | 2.7520912  | -0.5160812 |
| C    | -3.4891574 | 3.5321667  | -0.0954379 |
| F    | -3.4856864 | 4.8398411  | -0.4589430 |
| O    | 0.2366396  | 1.5821119  | -1.5615030 |
| Eu   | -0.4700208 | -0.1760330 | -0.1489622 |
| O    | -2.2300460 | 1.5406244  | -0.1134128 |
| O    | -1.2911400 | -2.4867801 | -0.3000566 |
| C    | -0.7655895 | -3.5824331 | -0.7014471 |
| C    | 0.4351792  | -3.6620663 | -1.4625834 |
| C    | 1.1684472  | -2.5528407 | -1.8726919 |
| C    | 2.4154428  | -2.7928827 | -2.7579247 |
| F    | 2.6893624  | -4.1059323 | -2.9816150 |
| C    | -1.4704779 | -4.8239360 | -0.3691988 |
| S    | -2.9547522 | -4.7143363 | 0.5342973  |
| C    | -3.1508452 | -6.4189088 | 0.5320472  |
| C    | -2.1229543 | -7.0578456 | -0.1326188 |
| C    | -1.1667427 | -6.1503696 | -0.6463019 |
| O    | 0.9572843  | -1.3203348 | -1.6391087 |
| O    | -2.1730415 | -0.4993194 | -2.0470727 |
| O    | -2.2514851 | -0.6019169 | 1.5609673  |
| O    | 0.4041608  | 1.3780752  | 1.4219259  |
| C    | 1.1099868  | 1.3661102  | 2.4873565  |
| C    | 1.6952181  | 0.1876838  | 3.0323741  |
| C    | 1.5535960  | -1.0594256 | 2.4334321  |
| C    | 2.2378860  | -2.2755261 | 3.1014538  |
| F    | 2.9249942  | -1.9663824 | 4.2339829  |
| O    | 0.9195869  | -1.3613057 | 1.3728515  |
| F    | 2.2543715  | -2.2060788 | -3.9752809 |
| F    | 3.5210671  | -2.2450610 | -2.1911842 |
| C    | 1.3197778  | 2.6449785  | 3.1691713  |
| C    | 2.0276371  | 2.9542317  | 4.3241716  |
| C    | 1.9800816  | 4.3293572  | 4.6504069  |
| C    | 1.2365389  | 5.0577251  | 3.7417899  |
| S    | 0.5950208  | 4.0749908  | 2.4911827  |
| F    | 1.3162714  | -3.2176195 | 3.4397289  |
| F    | 3.1172593  | -2.8629087 | 2.2482938  |
| F    | -3.6583509 | 3.4910738  | 1.2528344  |
| F    | -4.5995173 | 2.9658047  | -0.6515312 |
| H    | 2.2817443  | 0.2622697  | 3.9429747  |
| H    | 2.5633749  | 2.2139631  | 4.9158644  |
| H    | 2.4709587  | 4.7701782  | 5.5166339  |

|   |            |            |            |
|---|------------|------------|------------|
| H | 1.0351219  | 6.1258097  | 3.7476426  |
| H | 3.6840976  | 4.2705685  | -4.5813084 |
| H | 1.9928626  | 6.2862838  | -4.2567199 |
| H | -0.0558580 | 5.5853836  | -2.7694973 |
| H | -1.4508694 | 4.4578612  | -1.5206797 |
| H | 0.7882736  | -4.6428375 | -1.7666116 |
| H | -0.2817641 | -6.4602848 | -1.1991578 |
| H | -2.0612189 | -8.1391793 | -0.2443280 |
| H | -4.0127236 | -6.8657619 | 1.0204967  |
| H | -2.9269625 | 0.1142137  | -1.9774485 |
| H | -2.5523572 | -1.3970138 | -2.0233881 |
| H | -2.6603655 | -1.4797270 | 1.4442774  |
| H | -2.9525890 | 0.0635989  | 1.4160254  |

**Isomer I, of Eu(TTA)<sub>3</sub>(OH)<sub>2</sub> optimized with the QM/SPP in the chloroform CPCM solvent (Fig. S4a)**

| Atom | X(Å)       | Y(Å)       | Z(Å)       |
|------|------------|------------|------------|
| C    | 2.3986617  | -1.8590630 | 3.1362538  |
| C    | 2.4867098  | -2.3489212 | 1.8398761  |
| S    | 3.5762516  | -3.7083054 | 1.7795266  |
| C    | 3.8945024  | -3.6064963 | 3.4600892  |
| C    | 3.1978779  | -2.5729559 | 4.0567630  |
| C    | 1.7773402  | -1.8263180 | 0.6687351  |
| O    | 1.0204299  | -0.8168382 | 0.8485829  |
| Eu   | -0.5947230 | 0.4162482  | -0.3402015 |
| O    | -0.3498610 | 1.8660900  | 1.4740250  |
| C    | 0.5033961  | 2.7500687  | 1.7966366  |
| C    | 0.2853024  | 3.3124637  | 3.2232061  |
| F    | 1.2181773  | 4.2233725  | 3.6026235  |
| O    | -1.3555015 | 1.0588626  | -2.6074182 |
| O    | 1.0644144  | 1.3803168  | -3.6957795 |
| O    | 1.1656799  | 2.0261694  | -0.9630800 |
| C    | 1.8558935  | 2.8810348  | -0.2964696 |
| C    | 1.5566096  | 3.2595445  | 1.0441372  |
| O    | -2.7959294 | 1.3319571  | -0.2084152 |
| C    | -3.9363593 | 0.8368171  | 0.0566764  |
| C    | -4.2586262 | -0.4766853 | 0.3853283  |
| C    | -3.2850306 | -1.5112126 | 0.4589395  |
| O    | -2.0371881 | -1.3276068 | 0.2290732  |
| O    | 0.5194196  | -1.0285391 | -1.9044875 |
| C    | 1.3451501  | -1.9876007 | -1.7645544 |
| C    | 1.9693162  | -2.4390214 | -0.6068357 |
| C    | 3.0109372  | 3.5094496  | -0.9501600 |
| C    | 3.3851158  | 3.4443885  | -2.2874095 |
| C    | 4.5616111  | 4.1713618  | -2.5764805 |
| C    | 5.0915737  | 4.7865348  | -1.4594839 |
| S    | 4.1535490  | 4.4864897  | -0.0601679 |
| F    | 0.3085363  | 2.3082726  | 4.1387650  |
| F    | -0.9282993 | 3.9147780  | 3.3152423  |
| C    | -5.0817113 | 1.8755273  | -0.0199999 |
| F    | -6.3083355 | 1.3615423  | 0.2523885  |
| F    | -5.1421482 | 2.4216898  | -1.2651599 |

|   |            |            |            |
|---|------------|------------|------------|
| F | -4.8665047 | 2.8914782  | 0.8544601  |
| C | -3.7042872 | -2.8646374 | 0.8148118  |
| S | -2.5005634 | -4.1207901 | 0.8793036  |
| C | -3.6712168 | -5.2919754 | 1.3210105  |
| C | -4.9404081 | -4.7535058 | 1.4195378  |
| C | -4.9600987 | -3.3703728 | 1.1317723  |
| C | 1.6588347  | -2.7107370 | -3.0953259 |
| F | 2.0890587  | -1.8087335 | -4.0294621 |
| F | 2.6151464  | -3.6654228 | -2.9974237 |
| F | 0.5449866  | -3.3003980 | -3.5986373 |
| H | 2.8184734  | 2.9056701  | -3.0440718 |
| H | 5.0058604  | 4.2438823  | -3.5676536 |
| H | 5.9874108  | 5.3977741  | -1.3880584 |
| H | 2.1746358  | 4.0230879  | 1.5098477  |
| H | -5.2972295 | -0.7185294 | 0.5882304  |
| H | -3.3686981 | -6.3227328 | 1.4864640  |
| H | -5.8206553 | -5.3351221 | 1.6882855  |
| H | -5.8635511 | -2.7636780 | 1.1558946  |
| H | 2.6538955  | -3.2802147 | -0.6885516 |
| H | 4.5776798  | -4.3136540 | 3.9231923  |
| H | 3.2637761  | -2.3437433 | 5.1189750  |
| H | -0.5789924 | 1.2325965  | -3.2185418 |
| H | -1.9611064 | 1.8167956  | -2.6783475 |
| H | 1.3178769  | 0.4457467  | -3.8192596 |
| H | 1.3088231  | 1.5823385  | -2.7556748 |
| H | 1.7674497  | -1.0098301 | 3.3895867  |

**Isomer I, of  $U(TTA)_3(OH_2)_2$  optimized with the QM/SPP in the chloroform CPCM solvent (Fig. S4b)**

| Atom | X(Å)       | Y(Å)       | Z(Å)       |
|------|------------|------------|------------|
| C    | 3.6200195  | -1.3633445 | 2.5910100  |
| C    | 3.4116583  | -2.1754313 | 1.4792194  |
| S    | 4.5272940  | -3.5203555 | 1.4996442  |
| C    | 5.2430415  | -2.9860501 | 2.9683554  |
| C    | 4.6570275  | -1.8253061 | 3.4327639  |
| C    | 2.4259272  | -1.9766631 | 0.4345197  |
| O    | 1.6694775  | -0.9159957 | 0.5394458  |
| U    | 0.0095915  | 0.1071954  | -0.5560208 |
| O    | -0.3957328 | 1.1981066  | 1.3932242  |
| C    | -0.1665770 | 2.3627686  | 1.9062272  |
| C    | -0.7194101 | 2.5205408  | 3.3250667  |
| F    | -0.4952396 | 3.7528817  | 3.8519046  |
| O    | -0.1589253 | 0.7218465  | -3.0661116 |
| O    | 2.3787028  | 0.4151850  | -2.1174875 |
| O    | 0.9815738  | 2.2308709  | -0.7086210 |
| C    | 1.0699495  | 3.3157913  | 0.0051196  |
| C    | 0.5058909  | 3.4133983  | 1.3035302  |
| O    | -2.0682059 | 0.8682835  | -1.1188617 |
| C    | -3.2800237 | 0.5385281  | -0.7933902 |
| C    | -3.6682341 | -0.5423442 | -0.0210342 |
| C    | -2.7384247 | -1.4554998 | 0.5446179  |
| O    | -1.4557708 | -1.3277914 | 0.3609594  |

|   |            |            |            |
|---|------------|------------|------------|
| O | 0.4958433  | -1.7718103 | -1.7951114 |
| C | 1.3269697  | -2.7509425 | -1.6417527 |
| C | 2.2770255  | -2.8940251 | -0.6373358 |
| C | 1.7891718  | 4.4348496  | -0.5841659 |
| C | 2.3199847  | 4.5053057  | -1.8690692 |
| C | 2.9611633  | 5.7348319  | -2.1442738 |
| C | 2.9224156  | 6.6048784  | -1.0731798 |
| S | 2.1024086  | 5.9238588  | 0.2738553  |
| F | -0.1558309 | 1.6138866  | 4.1719275  |
| F | -2.0624723 | 2.3076033  | 3.3566019  |
| C | -4.3336192 | 1.4918526  | -1.3592495 |
| F | -5.6049292 | 1.1434729  | -1.0358166 |
| F | -4.2652790 | 1.5449341  | -2.7203768 |
| F | -4.1375045 | 2.7628096  | -0.9092173 |
| C | -3.1870470 | -2.5707017 | 1.3515218  |
| S | -2.0034762 | -3.6570235 | 2.0311841  |
| C | -3.2236569 | -4.6079718 | 2.7766764  |
| C | -4.4917760 | -4.1214238 | 2.5216419  |
| C | -4.4744866 | -2.9638483 | 1.7123929  |
| C | 1.1981017  | -3.8288808 | -2.7206153 |
| F | 1.4279487  | -3.3084077 | -3.9609743 |
| F | 2.0645942  | -4.8626528 | -2.5571150 |
| F | -0.0566626 | -4.3546340 | -2.7435466 |
| H | 2.2259228  | 3.6897216  | -2.5831179 |
| H | 3.4330216  | 5.9798140  | -3.0945393 |
| H | 3.3312074  | 7.6092662  | -1.0036930 |
| H | 0.6097268  | 4.3441852  | 1.8565738  |
| H | -4.7283775 | -0.6942477 | 0.1593633  |
| H | -2.9460658 | -5.4780874 | 3.3655166  |
| H | -5.3996490 | -4.5843794 | 2.9052323  |
| H | -5.3724259 | -2.4327809 | 1.4014836  |
| H | 2.9122860  | -3.7769192 | -0.6588206 |
| H | 6.0559373  | -3.5562223 | 3.4096852  |
| H | 4.9666701  | -1.3279406 | 4.3506335  |
| H | 0.7704403  | 0.8326390  | -3.3533700 |
| H | -0.6257022 | 1.5516304  | -3.2700791 |
| H | 3.0747983  | -0.2658904 | -2.1061689 |
| H | 2.7518498  | 1.1993980  | -1.6729314 |
| H | 3.0251921  | -0.4709261 | 2.7732908  |

**Isomer I, of Am(TTA)<sub>3</sub>(OH)<sub>2</sub> optimized with the QM/SPP in the chloroform CPCM solvent (Fig. S4c)**

| Atom | X(Å)      | Y(Å)       | Z(Å)       |
|------|-----------|------------|------------|
| C    | 3.1021806 | -3.1702098 | 2.2394261  |
| C    | 2.5605098 | -3.6635270 | 1.0599937  |
| S    | 2.9183037 | -5.3614273 | 0.8951754  |
| C    | 3.7740195 | -5.3898117 | 2.3807341  |
| C    | 3.7908183 | -4.1502994 | 2.9899957  |
| C    | 1.7881666 | -2.8972670 | 0.0766995  |
| O    | 1.6503009 | -1.6457061 | 0.3048083  |
| Am   | 0.2870655 | 0.1095321  | -0.5138308 |
| O    | 0.7100073 | 1.1382579  | 1.5545654  |

|   |            |            |            |
|---|------------|------------|------------|
| C | 0.8824039  | 2.3199492  | 2.0061468  |
| C | 0.8361542  | 2.3885727  | 3.5491143  |
| F | 1.0105400  | 3.6393323  | 4.0488769  |
| O | 0.1239076  | 1.0512198  | -2.8869955 |
| O | 2.7901730  | 0.3704757  | -1.3682349 |
| O | 1.1272804  | 2.5284900  | -0.8811362 |
| C | 1.2260825  | 3.5508103  | -0.1237189 |
| C | 1.1063143  | 3.4922351  | 1.2979785  |
| O | -1.7115716 | 1.4097606  | -0.5986650 |
| C | -2.9027923 | 1.2245938  | -0.1903880 |
| C | -3.4456634 | 0.1035933  | 0.4294810  |
| C | -2.6789496 | -1.0589182 | 0.7160290  |
| O | -1.4373791 | -1.1781426 | 0.4194363  |
| O | 0.1973011  | -1.6641575 | -2.1239756 |
| C | 0.5221134  | -2.8936213 | -2.0546282 |
| C | 1.2484444  | -3.5512794 | -1.0664794 |
| C | 1.5029479  | 4.8456510  | -0.7621003 |
| C | 1.6868409  | 5.0794291  | -2.1182022 |
| C | 1.9364242  | 6.4364121  | -2.4255923 |
| C | 1.9418768  | 7.2386468  | -1.3014692 |
| S | 1.6447283  | 6.3391316  | 0.1265081  |
| F | 1.8077112  | 1.6023801  | 4.0896091  |
| F | -0.3546400 | 1.9311622  | 4.0160684  |
| C | -3.8229674 | 2.4422586  | -0.4406369 |
| F | -5.1070209 | 2.2524314  | -0.0356336 |
| F | -3.8632316 | 2.7505434  | -1.7641536 |
| F | -3.3559573 | 3.5392677  | 0.2128908  |
| C | -3.3157240 | -2.1919457 | 1.3850654  |
| S | -2.3579123 | -3.6061492 | 1.7217019  |
| C | -3.6921685 | -4.4025685 | 2.4468988  |
| C | -4.8342548 | -3.6248427 | 2.4370060  |
| C | -4.6202184 | -2.3650370 | 1.8323511  |
| C | 0.0264836  | -3.7158018 | -3.2672157 |
| F | 0.5491519  | -3.2212007 | -4.4229889 |
| F | 0.3559897  | -5.0326608 | -3.2118042 |
| F | -1.3257418 | -3.6446219 | -3.3766382 |
| H | 1.6425986  | 4.2832805  | -2.8584781 |
| H | 2.1046305  | 6.8164832  | -3.4318493 |
| H | 2.1025884  | 8.3117676  | -1.2401761 |
| H | 1.2207868  | 4.4111941  | 1.8682578  |
| H | -4.4947029 | 0.1233735  | 0.7084204  |
| H | -3.5714114 | -5.4065800 | 2.8452769  |
| H | -5.7875056 | -3.9514764 | 2.8494974  |
| H | -5.3957057 | -1.6082421 | 1.7278967  |
| H | 1.4211969  | -4.6182234 | -1.1870749 |
| H | 4.2204502  | -6.3177288 | 2.7284223  |
| H | 4.2808195  | -3.9605759 | 3.9435582  |
| H | 0.6925550  | 0.5986289  | -3.5352348 |
| H | 0.5319670  | 1.9265391  | -2.7122461 |
| H | 3.4062163  | -0.1450291 | -0.8167722 |
| H | 3.0176795  | 1.3080961  | -1.2225537 |
| H | 2.9850609  | -2.1296514 | 2.5353237  |



**Isomer I, of Cm(TTA)<sub>3</sub>(OH)<sub>2</sub> optimized with the QM/SPP in the chloroform CPCM solvent (Fig. S4d)**

| Atom | X(Å)       | Y(Å)       | Z(Å)       |
|------|------------|------------|------------|
| C    | 2.6636524  | -2.9814272 | 2.7765330  |
| C    | 2.3458443  | -3.5296205 | 1.5415630  |
| S    | 2.7835456  | -5.2163530 | 1.5002991  |
| C    | 3.3763763  | -5.1678203 | 3.1085043  |
| C    | 3.2479584  | -3.9111119 | 3.6669914  |
| C    | 1.7245104  | -2.8194713 | 0.4149581  |
| O    | 1.5204249  | -1.5704323 | 0.5689939  |
| Cm   | 0.3194817  | 0.1617237  | -0.5865254 |
| O    | 0.5167489  | 1.0659374  | 1.6069283  |
| C    | 0.6095481  | 2.2570442  | 2.0473010  |
| C    | 0.3507482  | 2.3602390  | 3.5694851  |
| F    | 0.4081923  | 3.6284467  | 4.0538849  |
| O    | 0.0870520  | 0.6995510  | -3.0493092 |
| O    | 2.8222786  | 0.2589419  | -1.3495582 |
| O    | 1.2625180  | 2.4182230  | -0.7825914 |
| C    | 1.2661060  | 3.4496570  | -0.0282872 |
| C    | 0.9249147  | 3.4212650  | 1.3546042  |
| O    | -1.6549503 | 1.4978581  | -0.7063653 |
| C    | -2.8754406 | 1.3147936  | -0.3971814 |
| C    | -3.4749370 | 0.1783804  | 0.1351411  |
| C    | -2.7486178 | -1.0133774 | 0.4168716  |
| O    | -1.4934487 | -1.1463260 | 0.2089094  |
| O    | 0.4862315  | -1.7512103 | -2.0907986 |
| C    | 0.8432095  | -2.9598012 | -1.9053056 |
| C    | 1.4031699  | -3.5407952 | -0.7735783 |
| C    | 1.6767577  | 4.7207836  | -0.6409463 |
| C    | 2.0320860  | 4.9174366  | -1.9683537 |
| C    | 2.3802703  | 6.2554558  | -2.2634230 |
| C    | 2.2896363  | 7.0789358  | -1.1583639 |
| S    | 1.7820475  | 6.2226956  | 0.2370673  |
| F    | 1.2683863  | 1.6270620  | 4.2583759  |
| F    | -0.8745561 | 1.8661402  | 3.8836318  |
| C    | -3.7629051 | 2.5514770  | -0.6725227 |
| F    | -5.0752663 | 2.3666334  | -0.3680748 |
| F    | -3.7039276 | 2.9015314  | -1.9859590 |
| F    | -3.3331761 | 3.6220503  | 0.0467340  |
| C    | -3.4595984 | -2.1658495 | 0.9722297  |
| S    | -2.5562445 | -3.6162392 | 1.3038807  |
| C    | -3.9572017 | -4.4211396 | 1.8784706  |
| C    | -5.0812131 | -3.6194084 | 1.8230593  |
| C    | -4.7978768 | -2.3340246 | 1.3066720  |
| C    | 0.6064252  | -3.8552349 | -3.1439701 |
| F    | 1.2812452  | -3.3649778 | -4.2214317 |
| F    | 0.9996867  | -5.1445939 | -2.9803885 |
| F    | -0.7117540 | -3.8772078 | -3.4767100 |
| H    | 2.0332447  | 4.1051446  | -2.6921443 |
| H    | 2.6846093  | 6.6080382  | -3.2475320 |
| H    | 2.4935730  | 8.1444852  | -1.0935046 |
| H    | 0.9534113  | 4.3519533  | 1.9165801  |
| H    | -4.5412574 | 0.2036586  | 0.3379581  |

|   |            |            |            |
|---|------------|------------|------------|
| H | -3.8858442 | -5.4473475 | 2.2294314  |
| H | -6.0695132 | -3.9465118 | 2.1422272  |
| H | -5.5494012 | -1.5560512 | 1.1840798  |
| H | 1.6260725  | -4.6047297 | -0.8102140 |
| H | 3.7885311  | -6.0668467 | 3.5592060  |
| H | 3.5626307  | -3.6738752 | 4.6819420  |
| H | 0.4393515  | -0.0686964 | -3.5386755 |
| H | 0.4519743  | 1.5004791  | -3.4627039 |
| H | 3.4279332  | -0.2548845 | -0.7856304 |
| H | 3.0492140  | 1.1980355  | -1.2041044 |
| H | 2.4627455  | -1.9379873 | 3.0109850  |

**Isomer II, of  $\text{Eu}(\text{TTA})_3(\text{OH})_2$  optimized with the QM/SPP in the chloroform CPCM solvent (Fig. S5a)**

| Atom | X(Å)       | Y(Å)       | Z(Å)       |
|------|------------|------------|------------|
| S    | 2.0590672  | 2.4930875  | -3.3861606 |
| C    | 0.7727779  | 3.4337620  | -2.6852677 |
| C    | 0.8040547  | 4.7398238  | -3.1595887 |
| C    | 1.8559596  | 4.9688991  | -4.0757890 |
| C    | 2.6177331  | 3.8364348  | -4.2928393 |
| C    | -0.1327177 | 2.7776814  | -1.7411028 |
| C    | -1.1920418 | 3.5329158  | -1.1576923 |
| C    | -2.1269725 | 2.9894637  | -0.2821189 |
| C    | -3.2727943 | 3.9043578  | 0.2133295  |
| F    | -3.1750017 | 5.1943654  | -0.1966357 |
| O    | 0.0765106  | 1.5427854  | -1.4947043 |
| Eu   | -0.6396974 | -0.1479453 | -0.0332448 |
| O    | -2.2046014 | 1.8031100  | 0.1709697  |
| O    | -1.2753806 | -2.4088555 | 0.5930641  |
| C    | -0.9991136 | -3.5645158 | 0.1274444  |
| C    | -0.4569360 | -3.7979702 | -1.1708076 |
| C    | -0.2036588 | -2.7832954 | -2.0935778 |
| C    | 0.2814986  | -3.1917128 | -3.5076115 |
| F    | 0.4808553  | -4.5285855 | -3.6578526 |
| C    | -1.2804475 | -4.7197300 | 0.9860538  |
| S    | -1.9245899 | -4.4274286 | 2.5765766  |
| C    | -1.9819163 | -6.1068171 | 2.9236691  |
| C    | -1.5238660 | -6.8717315 | 1.8690403  |
| C    | -1.1238562 | -6.0821291 | 0.7654954  |
| O    | -0.3462167 | -1.5314839 | -1.9559669 |
| O    | -2.9556858 | -0.4221862 | -1.1559833 |
| O    | -2.0922276 | -0.1887238 | 2.0556845  |
| O    | 0.4939404  | 1.2146818  | 1.5724385  |
| C    | 1.6149991  | 1.2327903  | 2.1782820  |
| C    | 2.6261334  | 0.2423156  | 2.0059200  |
| C    | 2.4655303  | -0.8373829 | 1.1462455  |
| C    | 3.6180782  | -1.8647317 | 1.0355680  |
| F    | 4.6991455  | -1.5597184 | 1.8024049  |
| O    | 1.4696888  | -1.1253276 | 0.4090265  |
| F    | -0.6303264 | -2.8162830 | -4.4469219 |
| F    | 1.4504063  | -2.5758398 | -3.8137102 |
| C    | 1.8609351  | 2.3442563  | 3.1017675  |

|   |            |            |            |
|---|------------|------------|------------|
| C | 2.9648079  | 2.6448215  | 3.8896287  |
| C | 2.7954559  | 3.8250876  | 4.6505369  |
| C | 1.5645451  | 4.4145901  | 4.4367914  |
| S | 0.6118575  | 3.5378583  | 3.3117070  |
| F | 3.1958398  | -3.1004026 | 1.4148706  |
| F | 4.0528273  | -1.9639015 | -0.2471887 |
| F | -3.3283920 | 3.9185546  | 1.5718863  |
| F | -4.4757374 | 3.4343668  | -0.2272977 |
| H | 3.5535195  | 0.3303508  | 2.5632360  |
| H | 3.8662568  | 2.0351762  | 3.9177267  |
| H | 3.5454949  | 4.2282146  | 5.3291783  |
| H | 1.1716512  | 5.3227069  | 4.8865686  |
| H | 3.4814870  | 3.7276530  | -4.9435976 |
| H | 2.0493465  | 5.9252604  | -4.5590229 |
| H | 0.0920662  | 5.5059206  | -2.8576001 |
| H | -1.2920564 | 4.5801256  | -1.4269817 |
| H | -0.2676144 | -4.8225965 | -1.4764434 |
| H | -0.7341996 | -6.4994905 | -0.1612724 |
| H | -1.4776345 | -7.9593777 | 1.8913830  |
| H | -2.3467327 | -6.4481748 | 3.8888509  |
| H | -3.5991858 | 0.2453450  | -0.8581341 |
| H | -3.4498061 | -1.2470073 | -1.2992157 |
| H | -2.6811520 | -0.9644917 | 2.0645350  |
| H | -2.6617735 | 0.5992385  | 1.9540982  |

**Isomer II, of  $U(\text{TTA})_3(\text{OH}_2)_2$  optimized with the QM/SPP in the chloroform CPCM solvent (Fig. S5b)**

| Atom | X(Å)       | Y(Å)       | Z(Å)       |
|------|------------|------------|------------|
| S    | 3.4618908  | 2.9614230  | -1.1278265 |
| C    | 1.9171768  | 3.4592681  | -1.7674677 |
| C    | 2.0194715  | 4.7097468  | -2.3723834 |
| C    | 3.3256614  | 5.2461318  | -2.3154720 |
| C    | 4.2137138  | 4.4073179  | -1.6696189 |
| C    | 0.7762103  | 2.5760641  | -1.6027709 |
| C    | -0.4965395 | 2.9504819  | -2.1246670 |
| C    | -1.6354571 | 2.1747050  | -2.0039575 |
| C    | -2.9404897 | 2.6516764  | -2.6496448 |
| F    | -2.8407784 | 3.8614467  | -3.2565372 |
| O    | 0.9809265  | 1.4571270  | -0.9853870 |
| U    | -0.2764554 | -0.3224690 | -0.2096231 |
| O    | -1.7628391 | 1.0403332  | -1.3937231 |
| O    | -0.6933348 | -2.4525102 | -0.9021995 |
| C    | -0.0181555 | -3.5629572 | -1.0531009 |
| C    | 1.3842837  | -3.6284922 | -0.8386943 |
| C    | 2.1640323  | -2.5398159 | -0.4746956 |
| C    | 3.6645573  | -2.7254154 | -0.2477760 |
| F    | 4.0781507  | -4.0121754 | -0.3910153 |
| C    | -0.7629222 | -4.7391788 | -1.4494505 |
| S    | -2.4844754 | -4.5990301 | -1.7086030 |
| C    | -2.6212833 | -6.2677227 | -2.1018948 |
| C    | -1.4019233 | -6.9136576 | -2.0406711 |
| C    | -0.3453398 | -6.0504264 | -1.6720592 |

|   |            |            |            |
|---|------------|------------|------------|
| O | 1.7716407  | -1.3142392 | -0.3089605 |
| O | 0.2940050  | -0.5749726 | -2.7957064 |
| O | -2.7628984 | -0.7131515 | 0.3640581  |
| O | -0.5236585 | 1.2067611  | 1.4534232  |
| C | -0.6155356 | 1.2853438  | 2.7470977  |
| C | -0.5450911 | 0.1309531  | 3.5715643  |
| C | -0.3765447 | -1.1406470 | 3.0477010  |
| C | -0.3287797 | -2.3470807 | 3.9927741  |
| F | -0.4500853 | -2.0106819 | 5.3041328  |
| O | -0.2572515 | -1.4642766 | 1.8035330  |
| F | 4.3894556  | -1.9747026 | -1.1283073 |
| F | 4.0291634  | -2.3226522 | 0.9999019  |
| C | -0.8007354 | 2.6018831  | 3.3257818  |
| C | -0.9323175 | 2.9919761  | 4.6567144  |
| C | -1.1051092 | 4.3859831  | 4.8095743  |
| C | -1.1050167 | 5.0544883  | 3.6003276  |
| S | -0.8941321 | 3.9877311  | 2.2709980  |
| F | -1.3319707 | -3.2261296 | 3.7113935  |
| F | 0.8409437  | -3.0291920 | 3.8604106  |
| F | -3.9371443 | 2.7482444  | -1.7238451 |
| F | -3.3700688 | 1.7643240  | -3.5924241 |
| H | -0.6313561 | 0.2442470  | 4.6481705  |
| H | -0.9046764 | 2.2934636  | 5.4911929  |
| H | -1.2253816 | 4.8844937  | 5.7701933  |
| H | -1.2179412 | 6.1209567  | 3.4246630  |
| H | 5.2723928  | 4.5682086  | -1.4842883 |
| H | 3.6075893  | 6.2122649  | -2.7313226 |
| H | 1.1789992  | 5.2208591  | -2.8386370 |
| H | -0.5770226 | 3.8910987  | -2.6620706 |
| H | 1.8784832  | -4.5883044 | -0.9609722 |
| H | 0.6884912  | -6.3751681 | -1.5681873 |
| H | -1.2756094 | -7.9739698 | -2.2546053 |
| H | -3.5907975 | -6.6855722 | -2.3588088 |
| H | 1.1894581  | -0.2380927 | -2.9805264 |
| H | 0.2855245  | -1.4900348 | -3.1292814 |
| H | -3.0908314 | -1.6276352 | 0.2911879  |
| H | -3.2822723 | -0.1786480 | -0.2676113 |

**Isomer II, of Am(TTA)<sub>3</sub>(OH)<sub>2</sub> optimized with the QM/SPP in the chloroform CPCM solvent (Fig. S5c)**

| Atom | X(Å)       | Y(Å)      | Z(Å)       |
|------|------------|-----------|------------|
| S    | -3.2811360 | 2.9509841 | -2.2571269 |
| C    | -2.6508394 | 3.6888684 | -0.8114224 |
| C    | -3.0228940 | 5.0261139 | -0.7414513 |
| C    | -3.8069303 | 5.4398759 | -1.8428517 |
| C    | -4.0271144 | 4.4162272 | -2.7443562 |
| C    | -1.8516579 | 2.8684301 | 0.0977655  |
| C    | -1.3174470 | 3.4582297 | 1.2776983  |
| C    | -0.5655875 | 2.7538351 | 2.2124723  |
| C    | -0.0836604 | 3.5042828 | 3.4760628  |
| F    | -0.4463322 | 4.8133813 | 3.5129857  |
| O    | -1.6868328 | 1.6376048 | -0.2188651 |

|    |            |            |            |
|----|------------|------------|------------|
| Am | -0.2664928 | -0.1377815 | 0.4741004  |
| O  | -0.2064235 | 1.5318593  | 2.1965678  |
| O  | -1.0627023 | -2.5688279 | 0.6835253  |
| C  | -1.1486967 | -3.5459310 | -0.1364796 |
| C  | -1.0190319 | -3.4076688 | -1.5505033 |
| C  | -0.8058812 | -2.1911472 | -2.1837530 |
| C  | -0.7422616 | -2.1662185 | -3.7274791 |
| F  | -0.8863749 | -3.3890017 | -4.3024894 |
| C  | -1.4186498 | -4.8761332 | 0.4154711  |
| S  | -1.6131809 | -5.0363125 | 2.1383139  |
| C  | -1.8701858 | -6.7278235 | 2.0111805  |
| C  | -1.8106985 | -7.1644813 | 0.7025747  |
| C  | -1.5545924 | -6.1110360 | -0.2060882 |
| O  | -0.6563944 | -1.0368386 | -1.6590891 |
| O  | -2.7422496 | -0.4940697 | 1.3807674  |
| O  | -0.0242038 | -1.1886066 | 2.7919976  |
| O  | 1.4183573  | 1.2602825  | -0.3737151 |
| C  | 2.6602649  | 1.1947803  | -0.6840027 |
| C  | 3.4580358  | 0.0342786  | -0.4885536 |
| C  | 2.9480452  | -1.1433572 | 0.0489439  |
| C  | 3.9007629  | -2.3521964 | 0.2016453  |
| F  | 5.1771836  | -2.0984958 | -0.1926863 |
| O  | 1.7652231  | -1.3890826 | 0.4488842  |
| F  | -1.7222266 | -1.3685947 | -4.2327235 |
| F  | 0.4450582  | -1.6605100 | -4.1523110 |
| C  | 3.2646576  | 2.3906035  | -1.2691466 |
| C  | 4.5615389  | 2.6297338  | -1.7078402 |
| C  | 4.7406672  | 3.9367333  | -2.2161433 |
| C  | 3.5797739  | 4.6841205  | -2.1618182 |
| S  | 2.2701100  | 3.8016762  | -1.4933901 |
| F  | 3.9569922  | -2.7602538 | 1.4971678  |
| F  | 3.4582460  | -3.4076022 | -0.5327279 |
| F  | 1.2705387  | 3.4606483  | 3.5755688  |
| F  | -0.5870932 | 2.9190160  | 4.5978943  |
| H  | 4.5052503  | 0.0622251  | -0.7735637 |
| H  | 5.3560693  | 1.8868445  | -1.6646191 |
| H  | 5.6829619  | 4.3173962  | -2.6069317 |
| H  | 3.4317254  | 5.7120562  | -2.4823602 |
| H  | -4.5899931 | 4.4534877  | -3.6733869 |
| H  | -4.1959408 | 6.4485584  | -1.9723791 |
| H  | -2.7398399 | 5.6859375  | 0.0767874  |
| H  | -1.5193794 | 4.5074815  | 1.4707729  |
| H  | -1.1165883 | -4.2938418 | -2.1702529 |
| H  | -1.4688893 | -6.2542941 | -1.2817255 |
| H  | -1.9460327 | -8.2046260 | 0.4104849  |
| H  | -2.0519853 | -7.3163220 | 2.9065405  |
| H  | -3.3932531 | 0.0247353  | 0.8747583  |
| H  | -2.9394555 | -1.4311923 | 1.1924089  |
| H  | -0.4212309 | -2.0726054 | 2.6534641  |
| H  | -0.5550320 | -0.7461272 | 3.4783743  |

**Isomer II, of Cm(TTA)<sub>3</sub>(OH)<sub>2</sub> optimized with the QM/SPP in the chloroform CPCM solvent  
(Fig. S5d)**

| Atom | X(Å)       | Y(Å)       | Z(Å)       |
|------|------------|------------|------------|
| S    | -2.9046281 | 2.8962095  | -2.6132848 |
| C    | -2.4606067 | 3.6425628  | -1.1043901 |
| C    | -2.8726101 | 4.9697858  | -1.0731518 |
| C    | -3.5361957 | 5.3700495  | -2.2553494 |
| C    | -3.6253198 | 4.3453273  | -3.1784230 |
| C    | -1.7499238 | 2.8338185  | -0.1134064 |
| C    | -1.3816079 | 3.4354891  | 1.1280759  |
| C    | -0.7395812 | 2.7604236  | 2.1577849  |
| C    | -0.4571268 | 3.5313399  | 3.4676430  |
| F    | -0.8085877 | 4.8418025  | 3.4310312  |
| O    | -1.5099425 | 1.6180026  | -0.4200320 |
| Cm   | -0.1807388 | -0.1599832 | 0.4224178  |
| O    | -0.3502254 | 1.5452870  | 2.2044592  |
| O    | -0.4853849 | -2.4814735 | 1.2061052  |
| C    | -0.7876616 | -3.5709853 | 0.6065955  |
| C    | -1.3354118 | -3.6378977 | -0.7064786 |
| C    | -1.6276678 | -2.5236610 | -1.4861176 |
| C    | -2.2875076 | -2.7549383 | -2.8668190 |
| F    | -2.4480502 | -4.0661259 | -3.1891203 |
| C    | -0.5726967 | -4.8199871 | 1.3427113  |
| S    | 0.0717066  | -4.7252154 | 2.9575350  |
| C    | 0.0433497  | -6.4319196 | 3.1318282  |
| C    | -0.4394521 | -7.0605813 | 2.0011917  |
| C    | -0.7908425 | -6.1434130 | 0.9828706  |
| O    | -1.4469431 | -1.2903548 | -1.2259298 |
| O    | -2.3247171 | -0.4980998 | 1.8551835  |
| O    | 1.3022374  | -0.5959042 | 2.4237464  |
| O    | 1.4772021  | 1.3933157  | -0.2967582 |
| C    | 2.6098183  | 1.3786294  | -0.8911861 |
| C    | 3.2315521  | 0.1933381  | -1.3762993 |
| C    | 2.6455590  | -1.0620548 | -1.2542717 |
| C    | 3.4075172  | -2.2850830 | -1.8173917 |
| F    | 4.6018810  | -1.9732178 | -2.3887359 |
| O    | 1.5290640  | -1.3678218 | -0.7266939 |
| F    | -3.5204977 | -2.1803969 | -2.9069924 |
| F    | -1.5481418 | -2.1884305 | -3.8549719 |
| C    | 3.2874830  | 2.6634085  | -1.0739617 |
| C    | 4.5023851  | 2.9728145  | -1.6734313 |
| C    | 4.7983627  | 4.3551075  | -1.6419361 |
| C    | 3.8072301  | 5.0889011  | -1.0188307 |
| S    | 2.5155770  | 4.1025212  | -0.4712030 |
| F    | 3.6616398  | -3.1867232 | -0.8305491 |
| F    | 2.6671602  | -2.9221572 | -2.7618127 |
| F    | 0.8638527  | 3.4791041  | 3.7849277  |
| F    | -1.1369425 | 2.9641631  | 4.5062204  |
| H    | 4.1974143  | 0.2683553  | -1.8664667 |
| H    | 5.1574271  | 2.2276834  | -2.1215188 |
| H    | 5.7016768  | 4.7971922  | -2.0593197 |
| H    | 3.7744266  | 6.1629870  | -0.8555438 |

|   |            |            |            |
|---|------------|------------|------------|
| H | -4.0812468 | 4.3733069  | -4.1647050 |
| H | -3.9341090 | 6.3691363  | -2.4258132 |
| H | -2.7020009 | 5.6321178  | -0.2262664 |
| H | -1.6348533 | 4.4791584  | 1.2886521  |
| H | -1.5678310 | -4.6159444 | -1.1169323 |
| H | -1.1884931 | -6.4443100 | 0.0152859  |
| H | -0.5355810 | -8.1413413 | 1.9102392  |
| H | 0.3837152  | -6.8876392 | 4.0578850  |
| H | -2.3735705 | 0.1030228  | 2.6203758  |
| H | -2.3082340 | -1.4013409 | 2.2226443  |
| H | 1.1572602  | -1.4708383 | 2.8283149  |
| H | 1.0550124  | 0.0743506  | 3.0913265  |

**Structure of  $U(TTA)_3(OH)_2$  with the QM/LPP in the chloroform CPCM solvent obtained using isomer II as the starting structure (Fig. S6a)**

| Atom | X(Å)       | Y(Å)       | Z(Å)       |
|------|------------|------------|------------|
| S    | 2.7395545  | 2.6501357  | -2.8805089 |
| C    | 1.2106048  | 3.4538735  | -2.6644227 |
| C    | 1.2474405  | 4.7325579  | -3.2079713 |
| C    | 2.4965821  | 5.0501064  | -3.7893223 |
| C    | 3.4021549  | 4.0115678  | -3.6846867 |
| C    | 0.1386528  | 2.7289880  | -1.9784295 |
| C    | -1.1177468 | 3.3831766  | -1.7878562 |
| C    | -2.2205926 | 2.7938914  | -1.1823289 |
| C    | -3.5222900 | 3.6228790  | -1.0812331 |
| F    | -3.4303135 | 4.8742197  | -1.5998355 |
| O    | 0.3909566  | 1.5395495  | -1.5945877 |
| U    | -0.6895864 | -0.2818777 | -0.2989954 |
| O    | -2.3378511 | 1.6249795  | -0.6850277 |
| O    | -0.6284948 | -2.6620847 | -1.1782631 |
| C    | 0.1933858  | -3.6435175 | -1.1838732 |
| C    | 1.5392553  | -3.5576401 | -0.7275274 |
| C    | 2.1210133  | -2.3862635 | -0.2493198 |
| C    | 3.6116900  | -2.4339440 | 0.1685842  |
| F    | 4.1888575  | -3.6564742 | 0.0228823  |
| C    | -0.2952745 | -4.9232060 | -1.7033275 |
| S    | -1.9586076 | -5.0288192 | -2.2076587 |
| C    | -1.7779685 | -6.6757554 | -2.6523842 |
| C    | -0.4970183 | -7.1389870 | -2.4239795 |
| C    | 0.3475496  | -6.1413317 | -1.8834103 |
| O    | 1.5993250  | -1.2360022 | -0.1021795 |
| O    | -1.6303153 | -0.6962285 | -2.7715825 |
| O    | -3.2877118 | -0.8763074 | -0.0734925 |
| O    | 0.0519022  | 1.1409486  | 1.6014127  |
| C    | 0.1478107  | 1.0821014  | 2.8720416  |
| C    | -0.3707157 | 0.0097038  | 3.6602833  |
| C    | -1.0522186 | -1.0741813 | 3.1228514  |
| C    | -1.6045192 | -2.1439553 | 4.0933102  |
| F    | -1.3650276 | -1.8825662 | 5.4042383  |
| O    | -1.3136936 | -1.3308625 | 1.9002337  |
| F    | 4.3421867  | -1.5566142 | -0.5704556 |

|   |            |            |            |
|---|------------|------------|------------|
| F | 3.7546369  | -2.0774381 | 1.4722792  |
| C | 0.8218263  | 2.1923818  | 3.5479937  |
| C | 1.0802897  | 2.4191918  | 4.8944816  |
| C | 1.7690577  | 3.6315463  | 5.1284462  |
| C | 2.0300633  | 4.3195052  | 3.9588751  |
| S | 1.4413560  | 3.4960189  | 2.5748729  |
| F | -2.9551717 | -2.2629428 | 3.9501976  |
| F | -1.0676021 | -3.3633203 | 3.8229575  |
| F | -3.9088174 | 3.7543003  | 0.2164025  |
| F | -4.5387317 | 2.9929895  | -1.7361821 |
| H | -0.2469117 | 0.0503557  | 4.7383449  |
| H | 0.7841596  | 1.7336779  | 5.6865861  |
| H | 2.0633930  | 3.9879465  | 6.1142922  |
| H | 2.5415540  | 5.2717436  | 3.8448874  |
| H | 4.4284909  | 3.9823508  | -4.0412112 |
| H | 2.7255449  | 6.0017130  | -4.2664268 |
| H | 0.4021241  | 5.4182613  | -3.1887506 |
| H | -1.2264526 | 4.4009210  | -2.1509695 |
| H | 2.1569708  | -4.4495991 | -0.7716823 |
| H | 1.3944175  | -6.3096626 | -1.6370568 |
| H | -0.1800496 | -8.1584735 | -2.6379157 |
| H | -2.6256077 | -7.2236351 | -3.0555999 |
| H | -2.4609964 | -0.3138432 | -3.1035597 |
| H | -1.7483503 | -1.6666561 | -2.7883756 |
| H | -3.4224834 | -1.2193062 | 0.8305155  |
| H | -3.6816864 | 0.0199133  | -0.0865801 |

**Structure of  $U(\text{TTA})_3(\text{OH})_2$  with the QM/LPP in the chloroform CPCM solvent obtained using isomer I as the starting structure (Fig. S6b and S6c)**

| Atom | X(Å)       | Y(Å)       | Z(Å)       |
|------|------------|------------|------------|
| C    | 3.8285834  | -3.2950687 | 0.2232741  |
| C    | 2.7486704  | -3.7649912 | -0.5114286 |
| S    | 2.9736789  | -5.4478371 | -0.9051745 |
| C    | 4.4844083  | -5.5009583 | -0.0962067 |
| C    | 4.8142674  | -4.2803504 | 0.4600658  |
| C    | 1.5707925  | -2.9816253 | -0.9100954 |
| O    | 1.5745664  | -1.7444384 | -0.6054571 |
| U    | 0.0055021  | 0.2039042  | -0.5986598 |
| O    | 1.6365801  | 1.1179084  | 1.0537231  |
| C    | 2.1353944  | 2.2619718  | 1.3003851  |
| C    | 3.1170024  | 2.2498567  | 2.4976372  |
| F    | 3.6573544  | 3.4641209  | 2.7835240  |
| O    | -1.4634441 | 0.8222337  | -2.7629565 |
| O    | 1.8136445  | 0.4130421  | -2.5444780 |
| O    | 0.3927448  | 2.6515482  | -0.9952242 |
| C    | 1.0488338  | 3.6134223  | -0.4778591 |
| C    | 1.9148234  | 3.4711148  | 0.6474752  |
| O    | -2.3231518 | 1.0400421  | -0.1074055 |
| C    | -3.1753776 | 0.8286560  | 0.8188238  |
| C    | -3.0757859 | -0.0122568 | 1.9196725  |
| C    | -1.9347320 | -0.8282333 | 2.1858550  |



|   |            |            |            |
|---|------------|------------|------------|
| O | -0.8943096 | -0.8570023 | 1.4471686  |
| O | -0.9600102 | -1.7487026 | -1.9274529 |
| C | -0.6299714 | -2.9717598 | -2.0701535 |
| C | 0.5093628  | -3.6256979 | -1.6157191 |
| C | 0.8903219  | 4.9356204  | -1.1022470 |
| C | 0.0798737  | 5.2328084  | -2.1889269 |
| C | 0.1301038  | 6.5940722  | -2.5682097 |
| C | 0.9799801  | 7.3334297  | -1.7691011 |
| S | 1.7163613  | 6.3701340  | -0.5565774 |
| F | 4.1531652  | 1.3999749  | 2.2559704  |
| F | 2.4958074  | 1.8129518  | 3.6244150  |
| C | -4.4725157 | 1.6518462  | 0.6436390  |
| F | -5.4248151 | 1.3920524  | 1.5761014  |
| F | -5.0298561 | 1.4127411  | -0.5753742 |
| F | -4.2050883 | 2.9847227  | 0.7043981  |
| C | -1.9427495 | -1.6910072 | 3.3679234  |
| S | -0.5392526 | -2.6711465 | 3.6835741  |
| C | -1.2516647 | -3.3288432 | 5.0975317  |
| C | -2.5170175 | -2.8244132 | 5.3303824  |
| C | -2.9111361 | -1.8908446 | 4.3446981  |
| C | -1.6731441 | -3.7919305 | -2.8655487 |
| F | -1.8780502 | -3.2391308 | -4.0930801 |
| F | -1.3251163 | -5.0892441 | -3.0646566 |
| F | -2.8722962 | -3.7923180 | -2.2236012 |
| H | -0.5254103 | 4.4721022  | -2.6778858 |
| H | -0.4349348 | 7.0221955  | -3.3946218 |
| H | 1.2101700  | 8.3938813  | -1.8299871 |
| H | 2.4363247  | 4.3506158  | 1.0183055  |
| H | -3.9162325 | -0.0549595 | 2.6059637  |
| H | -0.7037005 | -4.0559436 | 5.6912429  |
| H | -3.1344221 | -3.1168972 | 6.1781948  |
| H | -3.8733792 | -1.3818076 | 4.3494978  |
| H | 0.6013486  | -4.6876243 | -1.8325375 |
| H | 5.0515055  | -6.4278329 | -0.0721401 |
| H | 5.7327654  | -4.1077659 | 1.0186652  |
| H | -1.7417189 | -0.0828221 | -3.0158889 |
| H | -2.2465073 | 1.2161169  | -2.3274884 |
| H | 2.6063984  | -0.1459420 | -2.4604963 |
| H | 2.1245712  | 1.2800638  | -2.8587521 |
| H | 3.8781376  | -2.2668084 | 0.5759296  |

**Structure of U(TTA)<sub>3</sub>(OH)<sub>2</sub> with the QM/SPP in the chloroform CPCM solvent obtained using isomer I as the starting structure (Fig. S6d)**

| Atom | X(Å)      | Y(Å)       | Z(Å)      |
|------|-----------|------------|-----------|
| C    | 3.6200195 | -1.3633445 | 2.5910100 |
| C    | 3.4116583 | -2.1754313 | 1.4792194 |
| S    | 4.5272940 | -3.5203555 | 1.4996442 |
| C    | 5.2430415 | -2.9860501 | 2.9683554 |
| C    | 4.6570275 | -1.8253061 | 3.4327639 |
| C    | 2.4259272 | -1.9766631 | 0.4345197 |
| O    | 1.6694775 | -0.9159957 | 0.5394458 |

|   |            |            |            |
|---|------------|------------|------------|
| U | 0.0095915  | 0.1071954  | -0.5560208 |
| O | -0.3957328 | 1.1981066  | 1.3932242  |
| C | -0.1665770 | 2.3627686  | 1.9062272  |
| C | -0.7194101 | 2.5205408  | 3.3250667  |
| F | -0.4952396 | 3.7528817  | 3.8519046  |
| O | -0.1589253 | 0.7218465  | -3.0661116 |
| O | 2.3787028  | 0.4151850  | -2.1174875 |
| O | 0.9815738  | 2.2308709  | -0.7086210 |
| C | 1.0699495  | 3.3157913  | 0.0051196  |
| C | 0.5058909  | 3.4133983  | 1.3035302  |
| O | -2.0682059 | 0.8682835  | -1.1188617 |
| C | -3.2800237 | 0.5385281  | -0.7933902 |
| C | -3.6682341 | -0.5423442 | -0.0210342 |
| C | -2.7384247 | -1.4554998 | 0.5446179  |
| O | -1.4557708 | -1.3277914 | 0.3609594  |
| O | 0.4958433  | -1.7718103 | -1.7951114 |
| C | 1.3269697  | -2.7509425 | -1.6417527 |
| C | 2.2770255  | -2.8940251 | -0.6373358 |
| C | 1.7891718  | 4.4348496  | -0.5841659 |
| C | 2.3199847  | 4.5053057  | -1.8690692 |
| C | 2.9611633  | 5.7348319  | -2.1442738 |
| C | 2.9224156  | 6.6048784  | -1.0731798 |
| S | 2.1024086  | 5.9238588  | 0.2738553  |
| F | -0.1558309 | 1.6138866  | 4.1719275  |
| F | -2.0624723 | 2.3076033  | 3.3566019  |
| C | -4.3336192 | 1.4918526  | -1.3592495 |
| F | -5.6049292 | 1.1434729  | -1.0358166 |
| F | -4.2652790 | 1.5449341  | -2.7203768 |
| F | -4.1375045 | 2.7628096  | -0.9092173 |
| C | -3.1870470 | -2.5707017 | 1.3515218  |
| S | -2.0034762 | -3.6570235 | 2.0311841  |
| C | -3.2236569 | -4.6079718 | 2.7766764  |
| C | -4.4917760 | -4.1214238 | 2.5216419  |
| C | -4.4744866 | -2.9638483 | 1.7123929  |
| C | 1.1981017  | -3.8288808 | -2.7206153 |
| F | 1.4279487  | -3.3084077 | -3.9609743 |
| F | 2.0645942  | -4.8626528 | -2.5571150 |
| F | -0.0566626 | -4.3546340 | -2.7435466 |
| H | 2.2259228  | 3.6897216  | -2.5831179 |
| H | 3.4330216  | 5.9798140  | -3.0945393 |
| H | 3.3312074  | 7.6092662  | -1.0036930 |
| H | 0.6097268  | 4.3441852  | 1.8565738  |
| H | -4.7283775 | -0.6942477 | 0.1593633  |
| H | -2.9460658 | -5.4780874 | 3.3655166  |
| H | -5.3996490 | -4.5843794 | 2.9052323  |
| H | -5.3724259 | -2.4327809 | 1.4014836  |
| H | 2.9122860  | -3.7769192 | -0.6588206 |
| H | 6.0559373  | -3.5562223 | 3.4096852  |
| H | 4.9666701  | -1.3279406 | 4.3506335  |
| H | 0.7704403  | 0.8326390  | -3.3533700 |
| H | -0.6257022 | 1.5516304  | -3.2700791 |
| H | 3.0747983  | -0.2658904 | -2.1061689 |
| H | 2.7518498  | 1.1993980  | -1.6729314 |

H 3.0251921 -0.4709261 2.7732908

**Structure of another isomer of Y(TTA)<sub>3</sub>(OH)<sub>2</sub> with the QM/SPP in the chloroform CPCM solvent (Fig. S7a)**

| Atom | X(Å)      | Y(Å)      | Z(Å)      |
|------|-----------|-----------|-----------|
| Y    | 0.007642  | -0.261945 | 0.400221  |
| O    | -0.480641 | 1.781652  | 1.465905  |
| C    | -0.716433 | 2.968511  | 1.066585  |
| C    | -0.978904 | 3.960868  | 2.222103  |
| F    | -1.172869 | 5.239947  | 1.810656  |
| F    | -2.082298 | 3.592199  | 2.926128  |
| F    | 0.066423  | 3.970998  | 3.091045  |
| C    | -0.768434 | 3.441669  | -0.237808 |
| H    | -0.992876 | 4.491335  | -0.399936 |
| C    | -0.534078 | 2.602754  | -1.362438 |
| O    | -0.263711 | 1.353738  | -1.270015 |
| C    | -0.598756 | 3.177612  | -2.704984 |
| S    | -0.355728 | 2.128522  | -4.072832 |
| C    | -0.554347 | 3.427198  | -5.174829 |
| H    | -0.483613 | 3.244946  | -6.243926 |
| C    | -0.802010 | 4.623988  | -4.530760 |
| H    | -0.958845 | 5.565834  | -5.053919 |
| C    | -0.827688 | 4.482590  | -3.124338 |
| H    | -1.004841 | 5.310603  | -2.440279 |
| O    | -2.001465 | -0.874364 | 1.405111  |
| C    | -3.021131 | -1.559260 | 1.059615  |
| C    | -4.091759 | -1.653759 | 2.170132  |
| F    | -3.547394 | -2.134893 | 3.319745  |
| F    | -4.597725 | -0.423008 | 2.450509  |
| F    | -5.139106 | -2.457058 | 1.854166  |
| C    | -3.265195 | -2.191288 | -0.150811 |
| H    | -4.196547 | -2.735607 | -0.271627 |
| C    | -2.339462 | -2.157924 | -1.232109 |
| O    | -1.222134 | -1.535106 | -1.182551 |
| C    | -2.668773 | -2.865381 | -2.468305 |
| S    | -1.552074 | -2.790486 | -3.800900 |
| C    | -2.556508 | -3.781443 | -4.774468 |
| H    | -2.249240 | -4.034652 | -5.785661 |
| C    | -3.709078 | -4.160630 | -4.114112 |
| H    | -4.476248 | -4.790974 | -4.560658 |
| C    | -3.773848 | -3.639575 | -2.801665 |
| H    | -4.601868 | -3.828678 | -2.120962 |
| O    | 0.964395  | -2.289401 | 0.873599  |
| C    | 2.159091  | -2.588635 | 1.197488  |
| C    | 2.351626  | -4.103945 | 1.440714  |
| F    | 2.045483  | -4.810889 | 0.319296  |
| F    | 3.616265  | -4.450384 | 1.797753  |
| F    | 1.523883  | -4.540398 | 2.427236  |
| C    | 3.262784  | -1.755990 | 1.347383  |
| H    | 4.206652  | -2.213321 | 1.628261  |
| C    | 3.228759  | -0.344371 | 1.151565  |

|   |           |           |           |
|---|-----------|-----------|-----------|
| O | 2.179670  | 0.310853  | 0.829832  |
| C | 4.462954  | 0.422919  | 1.324632  |
| S | 4.403723  | 2.147387  | 1.091208  |
| C | 6.075915  | 2.305684  | 1.436423  |
| H | 6.542512  | 3.287084  | 1.413748  |
| C | 6.668323  | 1.090543  | 1.721982  |
| H | 7.723170  | 0.978976  | 1.967686  |
| C | 5.749579  | 0.017720  | 1.658324  |
| H | 6.021665  | -1.018635 | 1.850352  |
| O | 0.198723  | -0.340952 | 2.932172  |
| H | 0.031965  | 0.613729  | 3.082638  |
| H | -0.647987 | -0.766150 | 3.174083  |
| O | 1.312179  | -0.873206 | -1.694055 |
| H | 1.293606  | -0.044597 | -2.211691 |
| H | 0.585781  | -1.410529 | -2.078041 |

**Structure of another isomer of  $Y(TTA)_3(OH_2)_2$  with the QM/SPP in the chloroform CPCM solvent (Fig. S7b)**

| Atom | X(Å)      | Y(Å)      | Z(Å)      |
|------|-----------|-----------|-----------|
| Y    | -0.430979 | -3.243195 | -3.710691 |
| O    | 0.933740  | -1.660702 | -2.702192 |
| C    | 1.962191  | -1.732717 | -1.963111 |
| C    | 2.519016  | -0.347547 | -1.554268 |
| F    | 1.583185  | 0.362774  | -0.869303 |
| F    | 2.852099  | 0.380819  | -2.651847 |
| F    | 3.625677  | -0.412667 | -0.766473 |
| C    | 2.615026  | -2.870989 | -1.495448 |
| H    | 3.489740  | -2.742136 | -0.862708 |
| C    | 2.174109  | -4.185584 | -1.807394 |
| O    | 1.150187  | -4.434879 | -2.531040 |
| C    | 2.907007  | -5.344291 | -1.279874 |
| S    | 4.360426  | -5.212153 | -0.327882 |
| C    | 4.490657  | -6.914888 | -0.173816 |
| H    | 5.317195  | -7.344472 | 0.385567  |
| C    | 3.463540  | -7.571106 | -0.822799 |
| H    | 3.365050  | -8.655085 | -0.841417 |
| C    | 2.565198  | -6.678265 | -1.451319 |
| H    | 1.682961  | -6.977432 | -2.012971 |
| O    | 1.181742  | -3.001733 | -5.383813 |
| C    | 1.522069  | -2.005330 | -6.099887 |
| C    | 2.830026  | -2.244852 | -6.889265 |
| F    | 2.704278  | -3.328698 | -7.703567 |
| F    | 3.862636  | -2.499401 | -6.042464 |
| F    | 3.202529  | -1.198541 | -7.671387 |
| C    | 0.872184  | -0.786538 | -6.258423 |
| H    | 1.322979  | -0.047199 | -6.913168 |
| C    | -0.379699 | -0.487877 | -5.649821 |
| O    | -1.000888 | -1.287760 | -4.869378 |
| C    | -1.023566 | 0.794010  | -5.943257 |
| S    | -2.537472 | 1.157528  | -5.164085 |
| C    | -2.638690 | 2.679359  | -5.948778 |

|   |           |           |           |
|---|-----------|-----------|-----------|
| H | -3.487819 | 3.330426  | -5.759474 |
| C | -1.557385 | 2.912954  | -6.775702 |
| H | -1.433573 | 3.822863  | -7.360399 |
| C | -0.637327 | 1.838911  | -6.772986 |
| H | 0.277842  | 1.830071  | -7.362055 |
| O | -1.675219 | -5.107291 | -2.849829 |
| C | -2.481469 | -5.223073 | -1.870684 |
| C | -2.965830 | -6.674772 | -1.649457 |
| F | -3.626132 | -7.128154 | -2.752023 |
| F | -1.911963 | -7.509418 | -1.446195 |
| F | -3.804339 | -6.822323 | -0.592648 |
| C | -2.966515 | -4.230401 | -1.026825 |
| H | -3.656293 | -4.518350 | -0.237091 |
| C | -2.604670 | -2.857571 | -1.163956 |
| O | -1.792316 | -2.429134 | -2.047387 |
| C | -3.180799 | -1.857775 | -0.257137 |
| S | -4.346295 | -2.231297 | 0.983383  |
| C | -4.425880 | -0.594625 | 1.487651  |
| H | -5.080826 | -0.314193 | 2.308087  |
| C | -3.593771 | 0.216694  | 0.740949  |
| H | -3.499056 | 1.288298  | 0.907407  |
| C | -2.887128 | -0.501169 | -0.250531 |
| H | -2.174496 | -0.068026 | -0.949422 |
| O | -0.193037 | -5.313346 | -5.029972 |
| H | -0.445952 | -6.020025 | -4.404033 |
| H | 0.732544  | -5.472233 | -5.288181 |
| O | -2.526574 | -3.425986 | -5.043926 |
| H | -3.283350 | -3.940103 | -4.713879 |
| H | -2.844922 | -2.517886 | -5.204523 |
